1 **A congenital hydrocephalus causing mutation in Trim71 results in stem cell**  
2 **differentiation defects through inhibiting *Lsd1* mRNA translation**

3

4 Qiuying Liu<sup>1</sup>, Mariah K. Novak<sup>1</sup>, Rachel M. Pepin<sup>1</sup>, Katharine R. Maschhoff<sup>1</sup>, Xiaoli  
5 Chen<sup>2</sup>, Shaojie Zhang<sup>2</sup>, and Wenqian Hu<sup>1\*</sup>

6

7 <sup>1</sup>Department of Biochemistry and Molecular Biology, Mayo Clinic, Rochester, MN,  
8 55905, USA

9 <sup>2</sup>Department of Computer Science, University of Central Florida, Orlando, FL, 32816,  
10 USA

11 \*Correspondence: [hu.wenqian@mayo.edu](mailto:hu.wenqian@mayo.edu)

12

13

14 **Keywords:** Trim71, Lin41, congenital hydrocephalus, Lsd1, Kdm1a, translational

15 control, post-transcriptional regulation, RNA-binding protein, stem cell differentiation

16 **Abstract**

17 Congenital hydrocephalus (CH) is a major cause of childhood morbidity. Mono-allelic  
18 mutations in Trim71, a conserved stem-cell-specific RNA-binding protein, cause CH,  
19 however, molecular basis for pathogenesis mediated by these mutations remains  
20 unknown. Here, using mouse embryonic stem cells as a model, we reveal that the  
21 mouse R783H mutation (R796H in human) significantly alters Trim71's mRNA substrate  
22 specificity and leads to accelerated stem-cell differentiation and neural lineage  
23 commitment. The mutant Trim71, but not the wild-type Trim71, binds *Lsd1* (*Kdm1a*)  
24 mRNA and represses its translation. Specific inhibition of this repression or a slight  
25 increase of Lsd1 in the mutant cells alleviates the defects in stem cell differentiation and  
26 neural lineage commitment. These results determine a functionally relevant target of the  
27 CH-causing Trim71 mutant that can potentially be a therapeutic target and provide  
28 molecular mechanistic insights into the pathogenesis of this disease.

## 29 **Introduction**

30 RNA-binding proteins (RBPs) control mRNA fate and are critical regulators of gene  
31 expression (Glisovic *et al*, 2008). These proteins play essential roles in animal  
32 development, and aberrations in RBPs contribute to a wide variety of human diseases  
33 (Brinegar & Cooper, 2016; Gebauer *et al*, 2021; Lukong *et al*, 2008). While the details of  
34 RBP-mediated regulations in a diverse range of physiological processes are becoming  
35 increasingly clear, our understanding of the molecular mechanisms by which mutations  
36 in RBPs result in diseases is still limited.

37       Congenital hydrocephalus (CH), a significant cause of childhood morbidity, is  
38 caused by imbalanced neurogenesis that leads to abnormal accumulation of  
39 cerebrospinal fluid in brain ventricles (Kahle *et al*, 2016). The primary treatment for CH  
40 is neurosurgical shunting, which has numerous complications. Human genome-wide  
41 association studies and pedigree analysis have identified several CH-causing mutations,  
42 including two mono-allelic and potential gain-of-function missense mutations in Trim71  
43 (Furey *et al*, 2018; Jin *et al*, 2020), a stem-cell specific RBP that is highly conserved  
44 from *C. elegans* to human (Connacher & Goldstrohm, 2021; Ecsedi & Grosshans, 2013).  
45 Trim71 binds to target mRNAs and down-regulates their expression through  
46 translational repression and/or enhanced mRNA degradation (Aeschimann *et al*, 2017;  
47 Chang *et al*, 2012; Liu *et al*, 2021a; Loedige *et al*, 2013; Welte *et al*, 2019; Worringer *et*  
48 *al*, 2014). Genetic studies in mice indicate that Trim71 is essential for early  
49 embryogenesis and proper neural differentiation, indicating it has critical functions  
50 during normal development (Chen *et al*, 2012; Cuevas *et al*, 2015; Maller Schulman *et*  
51 *al*, 2008). Mice with the homologous human CH-causing point mutations in Trim71 also

52 have CH and display defects in neurogenesis (Duy *et al*, 2022), arguing for conserved  
53 mechanisms of pathogenesis from the Trim71 mutants. How these mutations in Trim71  
54 cause diseases, such as CH, however, is still unknown.

55 Here, we dissected the molecular mechanisms of pathogenesis mediated by a  
56 disease-causing mutation in Trim71. Using mouse embryonic stem cells (mESCs) as a  
57 model, we compared the transcriptome-wide targets of wide-type (WT) Trim71 and the  
58 Trim71 bearing a homologous human CH-causing mutation (R783H in mouse, which is  
59 equivalent to R796H in human). This mutation significantly alters Trim71's mRNA  
60 substrates and leads to accelerated stem cell differentiation and neural lineage  
61 commitment. Among the mRNAs that are uniquely bound by the mutant Trim71, we  
62 determined that the mutant Trim71 represses *Lsd1* (*Kdm1a*) mRNA translation. Specific  
63 inhibition of this repression through deleting the mutant Trim71's binding site in the  
64 3'UTR of *Lsd1* mRNA or a modest increase of *Lsd1* in the mutant mESCs alleviates the  
65 defects in stem cell differentiation and neural lineage commitment. Altogether, these  
66 results determine a functionally relevant target of the CH-causing Trim71 mutant that  
67 can potentially be a therapeutic target and provide molecular mechanistic insights into  
68 the pathogenesis of CH caused by the R796H mutation in *TRIM71*. Moreover, our  
69 finding revealed that a disease-causing mutation in an RBP does not abolish RNA  
70 binding but alters its binding specificity, a mechanism by which gain-of-function  
71 mutations in RBPs can result in disease.

## 72 **Results**

### 73 **R783H Trim71 causes stem-cell and neural-differentiation defects.**

74 We used mESCs as a model to study the CH-causing mutations in Trim71 because: a)  
75 Trim71 is a highly conserved stem-cell-specific RBP (Connacher & Goldstrohm, 2021;  
76 Ecsedi & Grosshans, 2013); b) the homologous human CH-causing point mutations in  
77 mouse Trim71 also lead to CH and neurogenesis defects (Duy *et al.*, 2022). We chose  
78 the FLAG-Trim71 mESCs for mechanistic studies, because the bi-allelic FLAG-tag  
79 knock-in at the N-terminus of Trim71 in these mESCs enables unambiguous detection  
80 and isolation of the endogenous Trim71 using an anti-FLAG monoclonal antibody (Liu *et*  
81 *al.*, 2021a). Here, we studied the R783H Trim71 mutation in mouse, which is equivalent  
82 to the CH-causing R796H mutation in human TRIM71 (Furey *et al.*, 2018; Jin *et al.*,  
83 2020). This mutation is within the RNA-binding domain of Trim71 (Figure 1-figure  
84 supplement 1A), suggesting an alteration of the interactions between Trim71 and its  
85 target RNAs.

86 Using genome editing, we generated both monoallelic and bi-allelic R783H  
87 mutations on Trim71 in the FLAG-Trim71 mESCs (Figure 1-figure supplement 1B). In  
88 human, the monoallelic R796H mutation in TRIM71 causes CH, arguing that this  
89 mutation can be a gain-of-function mutation (Furey *et al.*, 2018; Jin *et al.*, 2020). A  
90 challenge of mechanistic studies in the heterozygous background, however, is that it is  
91 difficult to discriminate whether the identified phenotypes/interactions (e.g., mRNA  
92 substrates) are mediated directly by the mutant protein or by the potential alterations of  
93 the WT protein (e.g., potential dimerization between WT and mutant proteins). To  
94 circumvent this, we first used mESCs with the bi-allelic mutation for functional and

95 mechanistic studies on the R783H Trim71 mutant, and then we examined whether the  
96 identified mechanistic insights are disease relevant in mESCs with the monoallelic  
97 R783H mutation in Trim71.

98         The R783H mutation, in either the homozygous or the heterozygous background,  
99 does not alter the proliferation and apoptosis of mESCs under both stemness and  
100 differentiating conditions (Figure 1-figure supplement 2). In contrast, the Trim71  
101 knockout (KO) mESCs displayed impaired growth and increased apoptosis (Figure 1-  
102 figure supplement 2), which is consistent with the previous report (Chang *et al.*, 2012).  
103 These results argue that the R783H is not a loss-of-function mutation. Moreover, the  
104 R783H mutation does not impact the microRNA pathway in mESCs, because neither  
105 the levels of Ago2, the major argonaute protein in mESCs (Liu *et al*, 2021b), nor a group  
106 of microRNAs involved in either differentiation (e.g., let-7 microRNAs) or pluripotency  
107 (e.g., the miR-290, 291, 293) are altered in the R783H mutant mESCs (Figure 1-figure  
108 supplement 3).

109         In mESCs with the bi-allelic mutation, the R783H mutation resulted in a modest  
110 decrease (~80% of WT levels) in Trim71 levels (Figure 1A) but did not impact stem cell  
111 self-renewal, as revealed by either examining the expression of pluripotency factors  
112 (Figure 1A) or colony formation assays (Figure 1B). However, when subjected to the  
113 exit pluripotency assay, which evaluates the rate mESCs exit the pluripotent state  
114 (Betschinger *et al*, 2013), the R783H mutant mESCs lost pluripotency at a significantly  
115 increased rate compared to either the WT or the Trim71 knockout mESCs (Figure 1C).  
116 Moreover, when subjected to differentiation via embryonic body (EB) formation for 5  
117 days, the R783H mutant mESCs showed decreased levels of pluripotency factors than

118 either the WT or Trim71 knockout mESCs (Figure 1D). Consistent with these findings,  
119 immunofluorescence staining revealed that differentiating R783H mutant mESCs had  
120 less Rex1, a marker of pluripotency, than either the WT or the Trim71 KO mESCs  
121 (Figure 1E&F). These results collectively indicate that the R783H mutant mESCs are  
122 more prone to differentiation and argue that the R783H Trim71 mutation is a gain-of-  
123 function mutation, which is consistent with the observations that monoallelic R796H  
124 mutation in TRIM71 results in CH (Furey *et al.*, 2018).

125         As CH is a neurological disorder (Kahle *et al.*, 2016), we subjected mESCs to  
126 monolayer neural differentiation (Mulas *et al.*, 2019) and monitored the appearance of  
127 neural progenitor cells by examining the expression of Sox1 and Pax6, two critical  
128 transcription factors essential for neuroectodermal specification in mammals (Li *et al.*,  
129 2005). Compared to the WT mESCs, R783H mESCs showed both the earlier  
130 appearance and increased immunoblotting intensity of these two factors during the  
131 neural differentiation (Figure 1G), indicating that the CH-causing R783H Trim71  
132 mutation resulted in accelerated neural differentiation in mESCs. Consistently,  
133 immunofluorescence staining of Nestin, a marker of neural progenitor cells, indicated  
134 the R783H cells express higher Nestin than the WT cells at the Day5 of neural  
135 differentiation (Figure 1H). Moreover, when subjected to spontaneous differentiation  
136 through EB formation, the R783H mESCs specifically expressed more ectoderm  
137 markers than the WT mESCs (Figure 1-figure supplement 4). Altogether, these results  
138 indicated that the R783H Trim71 mutant led to stem cell and neural differentiation  
139 defects in mESCs.

140

141 **R783H Trim71 has altered target mRNA binding.**

142 The R783H mutation is located in the RNA-binding domain of Trim71 (Figure 1-figure  
143 supplement 1A). To determine how this mutation impacts Trim71:RNA interactions, we  
144 identified transcriptome-wide targets of the R783H Trim71 mutant in mESCs using  
145 crosslinking immunoprecipitation and sequencing (CLIP-seq) (Figure 2A) (Darnell,  
146 2010), which also revealed the R783H Trim71 binding region(s) on the target mRNAs.  
147 CLIP-seq was performed on the mESCs grown in the 2i+lif medium, which suppresses  
148 differentiation and maintains mESCs in the ground state (Ying *et al*, 2008). These  
149 culture conditions eliminated the potential differentiation differences between the WT  
150 and the R783H mESCs (Figure 2-figure supplement 1) and enabled us to evaluate how  
151 the CH-causing mutation impacts Trim71's target recognition under the same  
152 developmental state.

153 Comparative analysis of the CLIP-seq data from R783H Trim71 and WT Trim71  
154 (Liu *et al.*, 2021a) revealed two similarities. First, 3'UTR is one of the major binding  
155 regions for both the WT and the mutant Trim71 (Figure 2B, Supplementary file1).  
156 Second, WT and mutant-binding sites have a similar over-representation of predicted  
157 stem-loop structures, but no enriched primary sequence motifs, compared to  
158 randomized sequences, consistent with the results from *in vitro* studies that Trim71  
159 recognizes structural motifs (Kumari *et al*, 2018) (Figure 2C). Despite these common  
160 features, there is only a small overlap between the mRNAs bound by WT Trim71 and  
161 the mutant Trim71 (Figure 2D), implying that the mutant Trim71 regulates a different set  
162 of mRNAs compared to WT Trim71 does. To validate this finding, we performed CLIP-  
163 qRT-PCR in WT and the mutant mESCs. Both WT and the mutant Trim71 bound



164 *Cdkn1a* mRNA, a common target identified in the CLIP-seq data, however, only the  
165 mutant Trim71 bound *Lsd1*, *Ddx6*, and *Trim25* mRNAs (Figure 2E), three of the mutant-  
166 specific targets identified in the CLIP-seq data. Altogether, these results indicated that  
167 the CH-causing mutation in Trim71 significantly alters the substrate mRNAs to which it  
168 binds.

169 To determine whether or not this alteration of substrate RNAs is due to difference  
170 of RNA availability, we surveyed the transcriptomes of the WT and the R783H mutant  
171 mESCs grown in the 2i+lif medium, where both of these two types of mESCs have the  
172 same developmental status (Figure 2-figure supplement 1). Most (541 out of 545) of the  
173 R783H Trim71 mutant's target RNAs were not differentially expressed between the WT  
174 and the R783H mESCs (Figure 2-figure supplement 2), indicating that the difference of  
175 substrate RNAs between the WT and the R783H mutant Trim71 is not caused by the  
176 RNA availability in the WT and the R783H mESCs. Moreover, this result also argues  
177 that the R783H Trim71 mutant does not destabilize its substrate RNAs.

178 Gene ontology analysis revealed that mRNAs specifically bound by the R783H  
179 Trim71 mutant were over-represented for the genes involved in regulating stem cell  
180 differentiation and pluripotency (Figure 2F), consistent with the finding that the R783H  
181 Trim71 mutant mESCs displayed stem cell and neural differentiation defects (Figure 1).  
182 A caveat in interpreting these results is that binding does not necessarily result in  
183 expression changes. To identify the functional targets of the R783H Trim71 mutant, we  
184 used the following criteria: a) mRNAs uniquely bound by the mutant Trim71 but not the  
185 WT Trim71; b) mRNAs encoding proteins with conserved functions in controlling stem  
186 cell differentiation; c) mRNAs abundantly expressed in mESCs. Western blotting on the

187 resulting candidates revealed that *Lsd1* consistently had the most decreased levels in  
188 the mutant mESCs compared to WT mESCs (Figure 2-figure supplement 3), arguing  
189 that *Lsd1* mRNA may be a functional target of the R783H Trim71 mutant. *Lsd1* (*Kdm1a*)  
190 is a conserved lysine-specific histone demethylase that is critical for both pluripotency  
191 and neural lineage commitment (Han *et al*, 2014; Whyte *et al*, 2012). The CLIP-seq data  
192 indicated that there is a R783H mutant Trim71 specific binding peak in the 3'UTR of  
193 *Lsd1* mRNA, and this peak's signal is significantly higher than that from the size-  
194 matched input control (Van Nostrand *et al*, 2016) (Figure 2G), indicating that in mESCs,  
195 the mutant Trim71, but not the WT Trim71, specifically interacts with this region of *Lsd1*  
196 mRNA. In the subsequent experiments, we focused on the interaction between *Lsd1*  
197 (*Kdm1a*) mRNA and the mutant Trim71.

198

### 199 **R783H Trim71 represses *Lsd1* mRNA translation.**

200 Multiple lines of evidence indicated that the R783H Trim71 mutant represses *Lsd1*  
201 mRNA translation in mESCs. First, *Lsd1* protein decreased ~2 fold with no significant  
202 changes in the level of *Lsd1* mRNA in mutant mESCs compared to WT mESCs (Figure  
203 3A&B). Second, polysome analysis, which examines mRNA and ribosome association,  
204 revealed that *Lsd1* mRNA, but not a control mRNA, is translationally repressed in  
205 mutant mESCs compared to WT mESCs (Figure 3C&D). Third, when ectopically  
206 expressed in the WT mESCs, the R783H Trim71 mutant, but not WT Trim71, decreased  
207 *Lsd1* protein levels without altering its mRNA levels (Figure 3E&F), and specifically  
208 reduced the association of *Lsd1* mRNA with polyribosomes (Figure 3G&H). Altogether,

209 these results indicated that the translation of *Lsd1* mRNA was specifically repressed by  
210 the R783H Trim71 mutant.

211 This repression is dependent on the binding of the mutant Trim71 to the 3'UTR of  
212 *Lsd1* mRNA. Because in the *Lsd1* CLIP $\Delta$  mESCs, where the interaction between *Lsd1*  
213 mRNA 3'UTR and the mutant Trim71 was abolished (see below), the mutant Trim71  
214 failed to decrease both *Lsd1* protein level and *Lsd1* mRNA's association with  
215 polyribosomes in mESCs (Figure 3-figure supplement 1).

216 The sequence of the *Lsd1* mRNA 3'UTR is not conserved between mouse and  
217 human. However, similar stem-loop structures recognized by the mutant Trim71 (Figure  
218 2C) are predicted *in silico* to be present in the 3'UTR of human *LSD1* mRNA,  
219 suggesting that the corresponding mutant human TRIM71 may also be able to repress  
220 *LSD1*. To test this, we expressed WT and the corresponding R796H mutant TRIM71 in  
221 NCCIT cells, which are human embryonal carcinoma cells. The human mutant TRIM71,  
222 but not WT TRIM71, reduced LSD1 protein levels without significantly changing *LSD1*  
223 mRNA levels (Figure 3-figure supplement 2), similar to the results in mESCs (Figure  
224 3E&F), indicating the ability of the CH-causing Trim71 mutation to repress *Lsd1*  
225 expression is conserved between mouse and human.

226

227 **Specific inhibition of *Lsd1* repression alleviates stem cell and neural**  
228 **differentiation defects.**

229 To evaluate the functional relevance of the mutant-Trim71-mediated translational  
230 repression of *Lsd1* mRNA to the differentiation defects of the mutant mESCs, we  
231 generated bi-allelic deletion of the mutant Trim71-binding region (~60bp), defined from

232 the CLIP-seq (Figure 2G), in the 3'UTR of *Lsd1* using genome editing (Figure 4A). We  
233 named this deletion as Lsd1 CLIP $\Delta$ . CLIP-qRT-PCR indicated that in the Lsd1 CLIP $\Delta$   
234 mESCs the interaction between *Lsd1* mRNA and the mutant Trim71 was specifically  
235 disrupted. Because the mutant Trim71 did not bind *Lsd1* mRNA, but still specifically  
236 interacted with other target mRNAs, such as *Cdkn1a* mRNA and *Ddx6* mRNAs (Figure  
237 4B). Thus, the Lsd1 CLIP $\Delta$  enabled us to specifically examine the functional  
238 significance of the mutant-Trim71:*Lsd1*-mRNA interaction at both molecular and cell  
239 function levels.

240 At the molecular level, the Lsd1 CLIP $\Delta$  increased Lsd1 protein in the mutant  
241 Trim71 mESCs to a level similar to that in WT mESCs (Figure 4C&D). *Lsd1* mRNA,  
242 however, was not significantly increased (Figure 4D), further confirming the translational  
243 repression mediated by the R783H Trim71 mutant. Notably, unlike the observations in  
244 R783H Trim71 mutant mESCs, the Lsd1 CLIP $\Delta$  did not increase Lsd1 protein levels in  
245 WT mESCs (Figure 4C), indicating that the Lsd1 CLIP $\Delta$  sequence in the 3'UTR of *Lsd1*  
246 mRNA does not regulate Lsd1 production *in cis*, but controls *Lsd1* mRNA translation  
247 through interacting with the mutant Trim71. Moreover, in the Lsd1 CLIP $\Delta$  background,  
248 the R783H mutation did not alter the polysome association of *Lsd1* mRNA (Figure 4-  
249 figure supplement 1), which is different from the results in the WT background (Figure  
250 3C&D), indicating that the translation repression requires the binding of the R783H  
251 Trim71 mutant to *Lsd1* mRNA. These findings, combined with the R783H Trim71  
252 mutant CLIP-seq results, revealed that the CH-causing mutation significantly alters, but  
253 does not abolish, RNA target recognition by Trim71.

254 At the cell function level, the *Lsd1* CLIP $\Delta$  abolished the stem cell differentiation  
255 defects of the R783H Trim71 mutant mESCs, as indicated by both the exit pluripotency  
256 assay (Figure 4E) and the expression level of pluripotency markers during EB formation  
257 (Figure 4F). Moreover, during neural differentiation, the *Lsd1* CLIP $\Delta$  alleviated the  
258 accelerated neural differentiation in the mutant Trim71 mESCs. This was manifested as  
259 a decrease in Pax6 when the *Lsd1* CLIP $\Delta$  was introduced in the mutant mESCs (Figure  
260 4G). However, no significant changes of Sox1 were observed (Figure 4G). This is  
261 possibly due to additional functional targets of the R783H Trim71 mutant during neural  
262 differentiation. Nevertheless, these results collectively indicate that repression of *Lsd1*  
263 mRNA translation by the R783H Trim71 mutant is required for the stem cell and neural  
264 differentiation defects in the R783H Trim71 mESCs.

265

#### 266 **Increasing *Lsd1* alleviates the stem cell and neural differentiation defects.**

267 To evaluate the functional significance of *Lsd1* in the differentiation defects seen in the  
268 CH-causing R783H mutation, we asked whether increasing *Lsd1* protein levels could  
269 mitigate the phenotypes of the mutant mESCs. For this purpose, we generated stable  
270 mESC lines in which the expression of an *Lsd1*-GFP fusion protein can be induced by  
271 doxycycline (dox) in a dosage-dependent manner (Figure 5A). The GFP fusion enabled  
272 us to discriminate exogenous *Lsd1* from endogenous *Lsd1*. Modulation of dox levels  
273 revealed that a ~25% increase in *Lsd1* protein levels over endogenous levels alleviated  
274 the differentiation defects seen in the mutant mESCs, as revealed by both the exit  
275 pluripotency assay (Figure 5B) and the expression level of pluripotency markers during  
276 differentiation (Figure 5C). This alleviation is specific to the mutant mESCs, as

277 expression of exogenous Lsd1 at a similarly increased level did not cause phenotypical  
278 changes in WT mESCs (Figure 5A-C). Moreover, this alleviation requires the  
279 demethylase activity of Lsd1, because expressing a demethylase catalytic mutant of  
280 Lsd1 failed to mitigate the differentiation defects of the mutant mESCs (Figure 5-figure  
281 supplement 1). During neural differentiation, similar to the result from the Lsd1 CLIP $\Delta$   
282 approach (Figure 4G), although not decreasing Sox1 to the normal level, the slightly  
283 (~25%) increased Lsd1 reduced the overexpressed Pax6 in the mutant mESCs (Figure  
284 5D), indicating that increasing Lsd1 mitigates the neural differentiation defects in the  
285 mESCs with the CH-causing mutation. Thus, decreased Lsd1 protein levels in R783H  
286 Trim71 mutant mESCs plays a critical role in the observed stem cell and neural  
287 differentiation defects.

288

289 **Lsd1 plays an important role in the differentiation defects in mESCs with**  
290 **monoallelic R783H mutation on Trim71.**

291 A caveat of the above results is that although the bi-allelic R783H Trim71 mutation in  
292 mESCs provides critical functional and mechanistic insights into the mutant Trim71, it is  
293 the monoallelic R783H mutation that causes CH. To evaluate whether the mechanistic  
294 insights we obtained using bi-allelic R783H mESCs are relevant to the pathogenesis of  
295 the disease, we examined mESCs with a monoallelic R783H mutation in Trim71  
296 (R783H/+) (Figure 1-figure supplement 1B), which mimics the genetic setting of CH.  
297 The R783H/+ mESCs displayed similar stem cell and neural differentiation defects as  
298 the bi-allelic R783H mESCs, as indicated by decreased Lsd1 protein levels (Figure 6A),

299 rapid exit from pluripotency (Figure 6B&C), and accelerated neural differentiation  
300 (Figure 6D).

301 To determine whether increasing Lsd1 level reduce these stem cell and neural  
302 differentiation defects in mESCs with the monoallelic mutation, we used dox-inducible  
303 expression of Lsd1-GFP in the R783H/+ mESCs (Figure 6E). Expression of exogenous  
304 Lsd1-GFP in R783H/+ mESCs alleviated the defects in stem cell differentiation (Figure  
305 6F&G) and neural lineage commitment (Figure 6H). Thus, in the CH-mimic setting, a  
306 slight increase in Lsd1 protein levels can also mitigate the stem cell differentiation  
307 defects caused by the mutant Trim71.

## 308 **Discussion**

309 Here, we show that, in mouse embryonic stem cells, the CH-causing R783H Trim71  
310 gain-of-function mutation resulted in defects in stem cell differentiation and neural  
311 lineage commitment, both in the mono-allelic condition, as found in human patients, and  
312 the bi-allelic condition. Mechanistically, the R783H Trim71 mutation significantly  
313 changes the mRNA substrates to which Trim71 binds and potentially regulates in  
314 mESCs. Among the newly acquired mRNA substrates, we determined that the mutant  
315 Trim71 represses *Lsd1* mRNA translation. Specific inhibition of *Lsd1* translational  
316 repression or mild overexpression of *Lsd1*, both of which increase *Lsd1* protein levels,  
317 alleviate the differentiation defects in mESCs expressing the CH-causing R783H Trim71  
318 mutation. These results provide mechanistic insights into the pathogenesis of CH  
319 mediated by the R783H mutation in Trim71 and argue that *Lsd1* can be a potential  
320 therapeutic target for CH.

321

## 322 **Trim71 target recognition**

323 Our results reveal that the R783H mutation in Trim71 significantly changes its binding  
324 specificity for target mRNAs (Figure 2D). Given that both WT Trim71 and R783H Trim71  
325 interact with mRNAs that share similar predicted secondary structure motifs (Figure 2C),  
326 the molecular basis for their differing target specificities is unclear. Trim71, a highly  
327 conserved RBP, binds target RNAs through its NHL domain. Structural and *in vitro*  
328 binding studies indicate that the binding specificity of the NHL domain is determined by  
329 the shape of an RNA stem-loop structure and not by the primary sequence motifs  
330 (Kumari *et al.*, 2018). Based on a crystal structure of the NHL domain from *D.*



331 *melanogaster* Brat (Loedige *et al*, 2015), a close homolog of Trim71, the R796H  
332 mutation (R783H in mouse) is predicted to alter the interaction between Trim71 and  
333 RNA's phosphate backbone (Furey *et al.*, 2018). We speculate that the point mutation  
334 impacts RNA structural shape recognition, altering target mRNA binding. Consistent  
335 with this notion, comparison of the CLIP-seq datasets revealed that the major difference  
336 between WT and mutant Trim71 is a decreased stringency in the stem region of the  
337 predicted stem-loop/hairpin structure enriched in the mutant-Trim71-binding regions  
338 (Figure 2C).

339         However, the enriched structural motifs identified using CLIP-seq are likely  
340 necessary, but not sufficient, for the binding. Because similar structural motifs can be  
341 predicted *in silico* outside Trim71-binding regions defined by CLIP-seq in target mRNAs  
342 and in non-target mRNAs. This implies that besides the structural motifs, additional  
343 features are involved in Trim71's target recognition. Furthermore, it is unclear whether  
344 and when the *in silico* predicted secondary structures are formed *in vivo*. Unlike *in vitro*  
345 folding, formation of RNA structures *in vivo* is constrained by contexts (e.g., RBPs in the  
346 neighboring region, etc.). Thus, future structural studies on Trim71 combined with *in*  
347 *vivo* probing of RNA structures will reveal how Trim71 specifically recognizes its targets  
348 and how mutations alter this process.

349

### 350 **Characterization of functional RBP:mRNA interactions**

351 CLIP is widely used in identifying *in vivo* RBP:RNA interactions (Hafner *et al*, 2021; Lee  
352 & Ule, 2018); and, when combined with high throughput sequencing, this method has  
353 revealed transcriptome-wide binding sites and the corresponding target genes for many

354 RBPs (Van Nostrand *et al*, 2020). However, opportunistic or non-productive interactions  
355 can complicate identifying functional targets. While loss-of-function  
356 (knockout/knockdown) and gain-of-function (overexpression) approaches can determine  
357 RBPs' functions, these methods, however, provide limited insights into the significance  
358 of specific RBP:RNA interactions. Because an RBP usually binds and potentially  
359 regulates numerous RNAs, and knockout or overexpression of an RBP can lead to  
360 alteration in many RBP:RNA interactions, making assigning any phenotypic changes to  
361 specific RBP:RNA interactions challenging.

362         Here we specifically disrupted the interaction between the R783H Trim71 mutant  
363 and *Lsd1* mRNA, by deleting the 3'UTR binding site identified using CLIP-seq (Figure  
364 4A). This approach does not abolish the interactions between the mutant Trim71 and its  
365 other target mRNAs (Figure 4B), thereby we could specifically evaluate the role of this  
366 interaction plays in the R783H Trim71 mediated mESC differentiation defects. We  
367 believe similar approaches will reveal many more functional RBP:mRNA interactions in  
368 normal and pathological processes.

369

### 370 **Lsd1 and neural differentiation**

371 *Lsd1* is a conserved histone lysine-specific demethylase with critical functions in stem  
372 cell biology (Adamo *et al*, 2011; Whyte *et al.*, 2012). Besides histone, *Lsd1* can also  
373 modulate the methylation status of other proteins (e.g., p53) (Perillo *et al*, 2020).  
374 Previous studies indicated that the elimination of *Lsd1* through proteasome-mediated  
375 degradation promotes mESC differentiation toward neural lineage (Han *et al.*, 2014).  
376 Here we found that the CH-causing Trim71 mutant (R783H) binds to *Lsd1* mRNA and

377 repress its translation, leading to accelerated stem cell differentiation and premature  
378 neural lineage commitment.

379         When regulating histones in chromatin, Lsd1 can both activate and repress gene  
380 expression through association with different histone modification complexes (Kozub *et*  
381 *al*, 2017). We found that the ~50% reduction in Lsd1 protein levels in R783H Trim71  
382 mESCs, mediated by translational repression, results in differentiation defects (Figure 4),  
383 while a ~25% increase in Lsd1 protein levels in the same R783H Trim71 mESCs  
384 alleviates these defects (Figure 5). These observations argue that genes controlled by  
385 weak/dynamic Lsd1 binding may mediate the differentiation defects in the mutant  
386 mESCs. Because weak/dynamic interactions are more sensitive to concentration  
387 fluctuations than strong/steady interactions. Numerous Lsd1 target genes have been  
388 identified using ChIPs (chromatin immunoprecipitations), however the formaldehyde  
389 crosslinking step makes quantitatively discriminating weak versus strong  
390 chromatin:protein interactions challenging. Thus, non-crosslinking approaches, such as  
391 CUT&Tag (Kaya-Okur *et al*, 2019), may be more suitable for identifying those  
392 weak/dynamic Lsd1 chromatin targets altered in the mutant mESCs. It is also possible  
393 that the decreased Lsd1 in the mutant mESCs may change the methylation status,  
394 thereby modulating the activity/function, of non-histone proteins. Characterizing such  
395 potential functional targets of Lsd1 may reveal novel regulators of neural differentiation.

396         Finally, it is important to mention that although we identified Lsd1 as a critical  
397 functional target of the R783H Trim71 mutant, it is likely not the only functional target,  
398 because the altered Lsd1 protein levels can only partially explain the neural

399 differentiation defects. Additional functional target(s) of Trim71 with the CH-causing  
400 mutation may also contribute to these cellular defects.

## 401 **Materials and Methods**

402 All the antibodies, oligonucleotides, and plasmids used in this study are listed in  
403 Supplementary file 2.

404

## 405 **Cell Culture**

406 All the mouse ESCs used in this study are derived from ES-E14TG2a (ATCC CRL-  
407 1821). mESCs were cultured on 0.5% gelatin-coated tissue cultured plates, in either  
408 15%FBS + Lif medium or 2i+Lif medium (Mulas *et al.*, 2019). Human cell line NCCIT  
409 (ATCC, CRL-2073) was maintained in RPMI-1640 medium supplemented with 10%  
410 FBS. All cells were incubated at 37 °C with 5% CO<sub>2</sub>.

411

## 412 **CRISPR/Cas9-mediated Genome Editing in mESCs**

413 To generate the FLAG-Trim71R783H mESCs and FLAG-Trim71R783H<sup>+/-</sup> mESCs,  
414 FLAG-Trim71 mESCs were co-transfected with 2 µg of pWH464 (pSpCas9(BB)-2A-  
415 GFP (pX458)) carrying the targeting sgRNA (oWH4229) and 1 µg of donor oligo  
416 (oWH4189) using Fugene6. To generate Lsd1 CLIP $\Delta$  cells, 2 µg of pWH464 expressing  
417 a pair of sgRNAs targeting the indicated region were transfected into the mESCs.  
418 Transfected cells were single-cell sorted to 96-well plates. Colonies were then picked  
419 and expanded for validation by genotyping PCR followed by sequencing and Western  
420 blot analysis.

421

## 422 **Generation of Stable Cell Lines**

423 Stable cell lines expressing doxycycline-inducible mouse FLAG-Trim71, mouse FLAG-  
424 Trim71R783H, mouse LSD1-GFP, human 3xHA-Trim71, or human 3xHA-Trim71R796H  
425 were generated using a PiggyBac transposon-based expression system. Briefly, cells  
426 were co-transfected with indicated plasmids and PiggyBac transposase (pWH252).  
427 After 48hrs, cells were selected with 1 µg/ml puromycin for 4 days.

428

#### 429 **RNA extraction and RT-qPCR**

430 RNA was extracted from cells using RNA reagent and treated with DNase1 to remove  
431 contaminating DNA. cDNA was synthesized using random hexamers and Superscript2  
432 reverse transcriptase (Invitrogen) according to manufacture instructions. qPCR was  
433 performed in triplicate for each sample using the SsoAdvanced Universal SYBR Green  
434 Supermix (Bio-Rad) and a CFX96™ real-time PCR detection system (Bio-Rad).

435

#### 436 **Western Blotting**

437 Proteins were harvested in RIPA buffer (10 mM Tris-HCl pH 8.0, 140 mM NaCl, 1 mM  
438 EDTA, 1% Triton X-100, 0.5 mM EGTA, 0.1% SDS, 0.1% sodium deoxycholate, and  
439 protease inhibitor cocktail) and quantified with BCA assay kit. Protein samples were  
440 resolved by SDS-PAGE and then transferred to PVDF membranes. Western blotting  
441 was performed using a BlotCycler (Precision Biosystems) with the indicated antibodies.  
442 Signals were developed with the Western ECL substrate (Bio-Rad) and detected with  
443 an ImageQuant LAS 500 instrument (GE Healthcare).

444

#### 445 **Colony formation assay and exit from pluripotency assay**

446 For colony formation assay, 500 cells per well were plated on a 12-well plate in 15%  
447 FBS +Lif medium for 6 days. For exit from pluripotency assay, 1000 cells per well were  
448 plated on 6-well plate in differentiation media (15%FBS – Lif) for 2 days, then cultured in  
449 2i+Lif medium for another 5 days. Colonies were stained using an Alkaline Phosphatase  
450 Assay Kit (System Biosciences) and evaluated under an Olympus CK2 microscope.

451

#### 452 **Embryoid body formation and monolayer differentiation**

453 For embryoid body formation assay,  $3 \times 10^6$  mES cells were seeded into 10 cm  
454 bacterial grade Petri dish in 10 ml differentiation medium (DMEM/F12 supplemented  
455 with 15% FBS,  $1 \times$  penicillin/streptomycin, 0.1 mM Non-Essential Amino Acids, 2 mM L-  
456 glutamine, and 50  $\mu$ M 2-mercaptoethanol), and maintained on a horizontal rotator with a  
457 rotating speed of 30 rpm. The medium was changed at day 3 and the resultant EBs  
458 were harvested at day 5. For monolayer differentiation,  $1 \times 10^4$  mES cells per well were  
459 seeded into gelatin-coated 6-well plate in 2ml differentiation medium for 2 days.

460

#### 461 **Neural cell differentiation**

462 mESCs were dissociated and seeded onto 10  $\mu$ g/ml laminin-coated 6-well plate at a  
463 density of  $1 \times 10^4$  cells/cm<sup>2</sup> in N2B27 medium (Mulas *et al.*, 2019). The medium was  
464 changed on day 2 and every day thereafter. Cells were harvested at the indicated time  
465 points.

466

#### 467 **Polysome analysis**

468 Polysome analysis was performed using the methods described previously (Zhang *et al*,  
469 2017). Briefly, mESCs were lysed in the polysome lysis buffer (10 mM Tris-HCl pH 7.4,  
470 12 mM MgCl<sub>2</sub>, 100 mM KCl, 1% Tween-20, and 100 mg/mL cycloheximide). Then 5  
471 OD<sub>260</sub> cell lysate was loaded onto a 5%–50% (w/v) linear sucrose-density gradient,  
472 followed by centrifugation at 39,000 rpm in a Beckman SW-41Ti rotor for 2 hr at 4°C.  
473 The gradient was fractionated using a Gradient Station (BioComp) coupled with an  
474 ultraviolet 254nm detector (Bio-Rad EM-1).

475

#### 476 **CLIP-seq and peak calling, and RNA-seq**

477 CLIP-seq was performed using the method described in the previous paper. The peak  
478 calling was performed using the pipeline described previously (Chen *et al*, 2019; Liu *et*  
479 *al.*, 2021a). The CLIP-seq and RNA-seq datasets generated during this study are  
480 available at GEO: GSE183715 (reviewer access token: sfareaaynvuxlsz) and  
481 GSE196017 (reviewer access token: mzcxoiskjxepvex), respectively.



482 **Acknowledgments**

483 This work is supported by Mayo Foundation for Medical Education and Research. We  
484 thank Drs. J. Alvarez-Dominguez and G. Riddihough for critical comments.

485

486 **Author Contributions:** W.H. conceived the project and supervised the study. Q.L.,  
487 M.K.N., R.M.P., K.R.M., and W.H. performed experiments and interpreted the data. X.C.  
488 and S.Z. performed the computational analysis. W.H. wrote the manuscript with inputs  
489 from all the authors.

490

491 **Conflicts of Interests:** The authors declare no conflict of interest.

## 492 Reference

- 493 Adamo A, Sese B, Boue S, Castano J, Paramonov I, Barrero MJ, Izpisua Belmonte JC (2011) LSD1  
494 regulates the balance between self-renewal and differentiation in human embryonic stem cells.  
495 *Nat Cell Biol* 13: 652-659
- 496 Aeschimann F, Kumari P, Bartake H, Gaidatzis D, Xu L, Ciosk R, Grosshans H (2017) LIN41 Post-  
497 transcriptionally Silences mRNAs by Two Distinct and Position-Dependent Mechanisms. *Mol Cell*  
498 65: 476-489 e474
- 499 Betschinger J, Nichols J, Dietmann S, Corrin PD, Paddison PJ, Smith A (2013) Exit from  
500 pluripotency is gated by intracellular redistribution of the bHLH transcription factor Tfe3. *Cell*  
501 153: 335-347
- 502 Brinegar AE, Cooper TA (2016) Roles for RNA-binding proteins in development and disease.  
503 *Brain Res* 1647: 1-8
- 504 Chang HM, Martinez NJ, Thornton JE, Hagan JP, Nguyen KD, Gregory RI (2012) Trim71  
505 cooperates with microRNAs to repress Cdkn1a expression and promote embryonic stem cell  
506 proliferation. *Nat Commun* 3: 923
- 507 Chen J, Lai F, Niswander L (2012) The ubiquitin ligase mLin41 temporally promotes neural  
508 progenitor cell maintenance through FGF signaling. *Genes Dev* 26: 803-815
- 509 Chen X, Castro SA, Liu Q, Hu W, Zhang S (2019) Practical considerations on performing and  
510 analyzing CLIP-seq experiments to identify transcriptomic-wide RNA-protein interactions.  
511 *Methods* 155: 49-57
- 512 Connacher RP, Goldstrohm AC (2021) Molecular and biological functions of TRIM-NHL RNA-  
513 binding proteins. *Wiley Interdiscip Rev RNA* 12: e1620
- 514 Cuevas E, Rybak-Wolf A, Rohde AM, Nguyen DT, Wulczyn FG (2015) Lin41/Trim71 is essential  
515 for mouse development and specifically expressed in postnatal ependymal cells of the brain.  
516 *Front Cell Dev Biol* 3: 20
- 517 Darnell RB (2010) HITS-CLIP: panoramic views of protein-RNA regulation in living cells. *Wiley*  
518 *Interdiscip Rev RNA* 1: 266-286
- 519 Duy PQ, Weise SC, Marini C, Li XJ, Liang D, Dahl PJ, Ma S, Spajic A, Dong W, Juusola J *et al* (2022)  
520 Impaired neurogenesis alters brain biomechanics in a neuroprogenitor-based genetic subtype  
521 of congenital hydrocephalus. *Nat Neurosci* 25: 458-473
- 522 Ecsedi M, Grosshans H (2013) LIN-41/TRIM71: emancipation of a miRNA target. *Genes Dev* 27:  
523 581-589
- 524 Furey CG, Choi J, Jin SC, Zeng X, Timberlake AT, Nelson-Williams C, Mansuri MS, Lu Q, Duran D,  
525 Panchagnula S *et al* (2018) De Novo Mutation in Genes Regulating Neural Stem Cell Fate in  
526 Human Congenital Hydrocephalus. *Neuron* 99: 302-314 e304
- 527 Gebauer F, Schwarzl T, Valcarcel J, Hentze MW (2021) RNA-binding proteins in human genetic  
528 disease. *Nat Rev Genet* 22: 185-198
- 529 Glisovic T, Bachorik JL, Yong J, Dreyfuss G (2008) RNA-binding proteins and post-transcriptional  
530 gene regulation. *FEBS Lett* 582: 1977-1986
- 531 Hafner M, Katsantoni M, Köster T, Marks J, Mukherjee J, Staiger D, Ule J, Zavolan M (2021) CLIP  
532 and complementary methods. *Nature Reviews Methods Primers* 1: 20

- 533 Han X, Gui B, Xiong C, Zhao L, Liang J, Sun L, Yang X, Yu W, Si W, Yan R *et al* (2014) Destabilizing  
534 LSD1 by Jade-2 promotes neurogenesis: an antibraking system in neural development. *Mol Cell*  
535 55: 482-494
- 536 Jin SC, Dong W, Kundishora AJ, Panchagnula S, Moreno-De-Luca A, Furey CG, Allocco AA,  
537 Walker RL, Nelson-Williams C, Smith H *et al* (2020) Exome sequencing implicates genetic  
538 disruption of prenatal neuro-gliogenesis in sporadic congenital hydrocephalus. *Nat Med* 26:  
539 1754-1765
- 540 Kahle KT, Kulkarni AV, Limbrick DD, Jr., Warf BC (2016) Hydrocephalus in children. *Lancet* 387:  
541 788-799
- 542 Kaya-Okur HS, Wu SJ, Codomo CA, Pledger ES, Bryson TD, Henikoff JG, Ahmad K, Henikoff S  
543 (2019) CUT&Tag for efficient epigenomic profiling of small samples and single cells. *Nat*  
544 *Commun* 10: 1930
- 545 Kozub MM, Carr RM, Lomber GL, Fernandez-Zapico ME (2017) LSD1, a double-edged sword,  
546 confers dynamic chromatin regulation but commonly promotes aberrant cell growth. *F1000Res*  
547 6: 2016
- 548 Kumari P, Aeschimann F, Gaidatzis D, Keusch JJ, Ghosh P, Neagu A, Pachulska-Wieczorek K,  
549 Bujnicki JM, Gut H, Grosshans H *et al* (2018) Evolutionary plasticity of the NHL domain underlies  
550 distinct solutions to RNA recognition. *Nat Commun* 9: 1549
- 551 Lee FCY, Ule J (2018) Advances in CLIP Technologies for Studies of Protein-RNA Interactions.  
552 *Mol Cell* 69: 354-369
- 553 Li XJ, Du ZW, Zarnowska ED, Pankratz M, Hansen LO, Pearce RA, Zhang SC (2005) Specification  
554 of motoneurons from human embryonic stem cells. *Nat Biotechnol* 23: 215-221
- 555 Liu Q, Chen X, Novak MK, Zhang S, Hu W (2021a) Repressing Ago2 mRNA translation by Trim71  
556 maintains pluripotency through inhibiting let-7 microRNAs. *Elife* 10
- 557 Liu Q, Novak MK, Pepin RM, Eich T, Hu W (2021b) microRNA-mediated regulation of microRNA  
558 machinery controls cell fate decisions. *Elife* 10
- 559 Loedige I, Gaidatzis D, Sack R, Meister G, Filipowicz W (2013) The mammalian TRIM-NHL protein  
560 TRIM71/LIN-41 is a repressor of mRNA function. *Nucleic Acids Res* 41: 518-532
- 561 Loedige I, Jakob L, Treiber T, Ray D, Stotz M, Treiber N, Hennig J, Cook KB, Morris Q, Hughes TR  
562 *et al* (2015) The Crystal Structure of the NHL Domain in Complex with RNA Reveals the  
563 Molecular Basis of Drosophila Brain-Tumor-Mediated Gene Regulation. *Cell Rep* 13: 1206-1220
- 564 Lukong KE, Chang KW, Khandjian EW, Richard S (2008) RNA-binding proteins in human genetic  
565 disease. *Trends Genet* 24: 416-425
- 566 Maller Schulman BR, Liang X, Stahlhut C, DelConte C, Stefani G, Slack FJ (2008) The let-7  
567 microRNA target gene, Mlin41/Trim71 is required for mouse embryonic survival and neural  
568 tube closure. *Cell Cycle* 7: 3935-3942
- 569 Mulas C, Kalkan T, von Meyenn F, Leitch HG, Nichols J, Smith A (2019) Defined conditions for  
570 propagation and manipulation of mouse embryonic stem cells. *Development* 146
- 571 Perillo B, Tramontano A, Pezone A, Migliaccio A (2020) LSD1: more than demethylation of  
572 histone lysine residues. *Exp Mol Med* 52: 1936-1947
- 573 Van Nostrand EL, Freese P, Pratt GA, Wang X, Wei X, Xiao R, Blue SM, Chen JY, Cody NAL,  
574 Dominguez D *et al* (2020) A large-scale binding and functional map of human RNA-binding  
575 proteins. *Nature* 583: 711-719

576 Van Nostrand EL, Pratt GA, Shishkin AA, Gelboin-Burkhart C, Fang MY, Sundararaman B, Blue  
577 SM, Nguyen TB, Surka C, Elkins K *et al* (2016) Robust transcriptome-wide discovery of RNA-  
578 binding protein binding sites with enhanced CLIP (eCLIP). *Nat Methods* 13: 508-514  
579 Welte T, Tuck AC, Papasaikas P, Carl SH, Flemr M, Knuckles P, Rankova A, Buhler M, Grosshans  
580 H (2019) The RNA hairpin binder TRIM71 modulates alternative splicing by repressing MBNL1.  
581 *Genes Dev* 33: 1221-1235  
582 Whyte WA, Bilodeau S, Orlando DA, Hoke HA, Frampton GM, Foster CT, Cowley SM, Young RA  
583 (2012) Enhancer decommissioning by LSD1 during embryonic stem cell differentiation. *Nature*  
584 482: 221-225  
585 Worringer KA, Rand TA, Hayashi Y, Sami S, Takahashi K, Tanabe K, Narita M, Srivastava D,  
586 Yamanaka S (2014) The let-7/LIN-41 pathway regulates reprogramming to human induced  
587 pluripotent stem cells by controlling expression of prodifferentiation genes. *Cell Stem Cell* 14:  
588 40-52  
589 Ying QL, Wray J, Nichols J, Batlle-Morera L, Doble B, Woodgett J, Cohen P, Smith A (2008) The  
590 ground state of embryonic stem cell self-renewal. *Nature* 453: 519-523  
591 Zhang X, Chen X, Liu Q, Zhang S, Hu W (2017) Translation repression via modulation of the  
592 cytoplasmic poly(A)-binding protein in the inflammatory response. *Elife* 6  
593

594 **Figure Legends**

595 **Figure 1. The CH-causing Trim71 mutation results in stem cell and neural**  
596 **differentiation defects in mESCs.**

597 A. Western blotting in the WT, Trim71 knockout (Trim71\_KO), and the Trim71  
598 mutant (R783H) mESCs.

599 B. Colony formation assay for mESCs. The mESCs were cultured in 15%FBS + Lif  
600 for 7 days, and the resultant colonies were fixed and stained for AP.

601 C. Exit pluripotency assay for mESCs. The mESCs were induced to exit  
602 pluripotency in medium without Lif for 2 days and then switched to 2i+Lif medium  
603 for 5 days. The resultant colonies were fixed and stained for AP.

604 D. Western blotting of pluripotency factors during EB formation.

605 E. Immunofluorescence (IF) staining showing the expression level of Rex1 in  
606 mESCs cultured in the stemness (2i + Lif) and differentiating (15% FBS – Lif)  
607 conditions.

608 F. Relative intensity of IF signals from individual cells in experiment associated with  
609 E.

610 G. Expression of neural lineage markers during mESCs neural differentiation.

611 H. IF staining of Nestin. The quantifications represent the means ( $\pm$  SD) of three  
612 independent experiments.

613 In A, D, and G, representative Western blots are shown, and the quantifications  
614 represent the means ( $\pm$  SD) of three independent experiments.

615 In B and C, the colony morphology and AP intensity were evaluated through  
616 microscopy. 100-200 colonies were examined each time to determine the

617 percentage of undifferentiated colonies. The results represent the means ( $\pm$  SD) of  
618 three independent experiments. Student's t-test was used to determine the  
619 significance of the difference, \* $p < 0.05$ ; and n.s. not significant ( $p > 0.05$ ).

620 The following figure supplements are available for Figure 1:

621 Figure supplement 1. Generation of the Trim71 R783H monoallelic and bi-allelic mESCs.

622 Figure supplement 2. The R783H mutation in Trim71 does not change the proliferation  
623 and apoptosis of mESCs.

624 Figure supplement 3. The R783H mutation in Trim71 does not alter the microRNA  
625 pathway in mESCs.

626 Figure supplement 4. The R783H mESCs are more prone differentiate into the  
627 ectoderm lineage during EB formation.

628 Figure 1 – source data

629 Tiff files of raw gel images for Figure 1A, D, G; Figure 1-figure supplement 3.

630 **Figure 2. Transcriptome-wide identification of the target mRNAs of the Trim71**  
631 **mutant R783H in mESCs.**

- 632 A. A work flow of the CLIP-seq analysis.
- 633 B. Distribution of the WT Trim71 and the R783H Trim71 mutant binding regions in  
634 the mouse genome. In each CLIP-seq, there are two biological replicates. The  
635 binding regions present in both of the biological replicates are used for the  
636 analysis.
- 637 C. Comparison of RNA secondary structures over-represented in the Trim71 mutant  
638 R783H and Trim71. “H”, “S”, and “I” indicates a nucleotide in a hairpin loop  
639 region, a stack region, and an internal loop region, respectively.
- 640 D. Venn diagram showing the genes with binding sites from the WT Trim71 and the  
641 Trim71 mutant R783H.
- 642 E. CLIP-qRT-PCR for the identified target mRNAs of the Trim71 mutant R783H.  
643 The results represent the means ( $\pm$ SD) of three independent experiments.
- 644 F. Gene ontology analysis of the mRNAs with 3’UTR binding sites from the WT  
645 Trim71 and the R783H Trim71 mutant.
- 646 G. UCSC genome browser snapshot for the CLIP-seq data from Trim71 and the  
647 Trim71 mutant R783H in the *Lsd1* locus. The red box indicates the binding region  
648 of the Trim71 mutant R783H. The inputs are from the size-matched input  
649 samples in the CLIP-seq analysis.

650 The following figure supplement is available for Figure 2:

651 Figure supplement 1. Colony formation assay for the WT and the R783H mESCs grown  
652 in the 2i+lif medium.

- 653 Figure supplement 2. RNA-seq analysis of the WT and R783H mESCs.
- 654 Figure supplement 3. Identification of potential functional targets of the R783H Trim71
- 655 mutant.
- 656 Figure 2 - source data
- 657 Tiff files of raw gel images for Figure 2-figure supplement 3.



658 **Figure 3. The Trim71 mutant R783H represses *Lsd1* mRNA translation in mESCs.**

- 659 A. Western blotting in the WT and the Trim71 (R783H) mESCs.
- 660 B. Quantification of *Lsd1* protein and mRNA levels. *Gapdh* and 18S rRNA were  
661 used for normalization in protein and mRNA quantifications, respectively.
- 662 C. Polysome analysis in the WT and the Trim71 (R783H) mESCs.
- 663 D. Quantification of the indicated mRNA distribution in the RNP, 80S, and polysome  
664 fractions from the WT and the Trim71 (R783H) mESCs.
- 665 E. Western blotting in the WT mESCs expressing an empty vector, Flag-Trim71,  
666 Flag-Trim71(R783H).
- 667 F. Quantification of *Lsd1* protein and mRNA in the WT mESCs expressing an empty  
668 vector, Flag-Trim71, Flag-Trim71(R783H).
- 669 G. Polysome analysis in the WT mESCs expressing an empty vector, Flag-Trim71,  
670 Flag-Trim71(R783H).
- 671 H. Quantification of the indicated mRNA distribution in the RNP, 80S, and polysome  
672 fractions from the WT mESCs expressing an empty vector, Flag-Trim71, Flag-  
673 Trim71(R783H).

674 The quantification results in B, D, F, and H represent the means ( $\pm$  SD) of three  
675 independent experiments. \* $p < 0.05$ ; and n.s. not significant ( $p > 0.05$ ) by the Student's  
676 t-test.

677 The following figure supplement is available for Figure 3:

678 Figure supplement 1. Repression of *Lsd1* mRNA translation by the Trim71 mutant  
679 R783H is dependent on its binding to *Lsd1* mRNA.

680 Figure supplement 2. The human TRIM71 mutant R796H represses LSD1.

681 Figure 3 - source data

682 Tiff files of raw gel images for Figure 3A, E, Figure 3-figure supplement 1A, Figure3-

683 figure supplement 2.

684

685 **Figure 4. Specific inhibition of the interaction between the Trim71 mutant R783H**  
686 **and *Lsd1* mRNA alleviates the stem cell and neural differentiation defects in the**  
687 **Trim71(R783H) mESCs.**

688 A. Deletion of the Trim71 mutant R783H binding site in *Lsd1* mRNA's 3'UTR.

689 B. CLIP-RIP followed by qRT-PCR to examine mRNAs associated with the Trim71  
690 and the Trim71 mutant R783H in the WT, Trim71(R783H), CLIP $\Delta$ , and  
691 Trim71(R783H)/CLIP $\Delta$  mESCs. The mRNA signals from the E14 mESCs were  
692 set as 1 for relative comparison.

693 C. Western blotting in the WT, Trim71(R783H), CLIP $\Delta$ , and Trim71(R783H)/CLIP $\Delta$   
694 mESCs.

695 D. Quantification of *Lsd1* protein and mRNA in the WT, Trim71(R783H), CLIP $\Delta$ , and  
696 Trim71(R783H)/CLIP $\Delta$  mESCs. Beta-Tubulin and 18S rRNA were used for  
697 normalization in the protein and mRNA quantification, respectively.

698 E. Exit pluripotency assay for mESCs.

699 F. Representative Western blotting and quantification of pluripotency factors during  
700 EB formation.

701 G. Representative Western blotting and quantification of neural lineage markers  
702 during mESCs neural differentiation.

703 The results from B, D, F, and G represent the means ( $\pm$  SD) of three independent  
704 experiments. In E, the colony morphology and AP intensity were evaluated through  
705 microscopy. 100-200 colonies were examined each time to determine the percentage of  
706 undifferentiated colonies. \* $p < 0.05$ ; and n.s. not significant ( $p > 0.05$ ) by the Student's t-  
707 test.

708 The following figure supplement is available for Figure 4:  
709 Figure supplement 1. The R783H mutation in the Lsd1 CLIP $\Delta$  background does not  
710 alter the polysome association of Lsd1 mRNA.  
711 Figure 4 - source data  
712 Tiff files of raw gel images for Figure 4A, C, F, and G.  
713

714 **Figure 5. A slight increase of Lsd1 alleviates the stem cell and neural**  
715 **differentiation defects in the Trim71(R783H) mESCs.**

716 A. Western blotting in the WT and the Trim71(R783H) mESCs with dox-inducible  
717 expression of Lsd1-GFP.

718 B. Exit pluripotency assay for mESCs.

719 C. Representative Western blotting and quantification of pluripotency factors during  
720 the monolayer differentiation of mESCs.

721 D. Representative Western blotting and quantification of neural lineage markers  
722 during mESCs neural differentiation.

723 In B, the colony morphology and AP intensity were evaluated through microscopy. 100-  
724 200 colonies were examined each time to determine the percentage of undifferentiated  
725 colonies. The quantification results from C and D represent the means ( $\pm$  SD) of three  
726 independent experiments. \* $p < 0.05$ ; and n.s. not significant ( $p > 0.05$ ) by the Student's t-  
727 test.

728 The following figure supplement is available for Figure 5:

729 Figure supplement 1. The demethylase catalytic mutant Lsd1 fails to alleviate the stem  
730 cell differentiation defects in the Trim71(R783H) mESCs.

731 Figure 5 - source data

732 Tiff files of raw gel images for Figure 5A, C, D, and Figure 5-figure supplement 1A, C.

733

734 **Figure 6. Monoallelic R783H mutation on Trim71 results in stem cell and neural**  
735 **differentiation defects in a Lsd1 dependent manner.**

736 A. Representative Western blotting and quantification in the WT and the R783H/+  
737 mESCs.

738 B. Exit pluripotency assay for the WT and the R783H/+ mESCs.

739 C. Representative Western blotting and quantification of pluripotency factors in  
740 differentiating mESCs.

741 D. Representative Western blotting and quantification of neural lineage markers  
742 during mESCs neural differentiation.

743 E. Western blotting in the WT and the R783H/+ mESCs with dox-inducible  
744 expression of Lsd1-GFP.

745 F. Exit pluripotency assay for the WT and the R783H/+ mESCs with dox-inducible  
746 expression of Lsd1-GFP.

747 G. Representative Western blotting and quantification of pluripotency factors during  
748 the differentiation of the WT and the R783H/+ mESCs with dox-inducible  
749 expression of Lsd1-GFP.

750 H. Representative Western blotting and quantification of neural lineage markers  
751 during the neural differentiation of the WT and the R783H/+ mESCs with dox-  
752 inducible expression of Lsd1-GFP.

753 In B and F, the colony morphology and AP intensity were evaluated through microscopy.  
754 100-200 colonies were examined each time to determine the percentage of  
755 undifferentiated colonies. The quantification results from A-D and F-H represent the

756 means ( $\pm$  SD) of three independent experiments. \* $p < 0.05$ ; and n.s. not significant

757 ( $p > 0.05$ ) by the Student's t-test.

758 Figure 6 - source data

759 Tiff files of raw gel images for Figure 6A, C, D, E, G, and H.

760

761 Supplemental file 1. CLIP-seq peaks from the WT Trim71 and the R783H Trim71

762 mutant in mESCs.

763 Supplemental file 2. Antibodies, plasmids, and oligonucleotides used in this study.

764

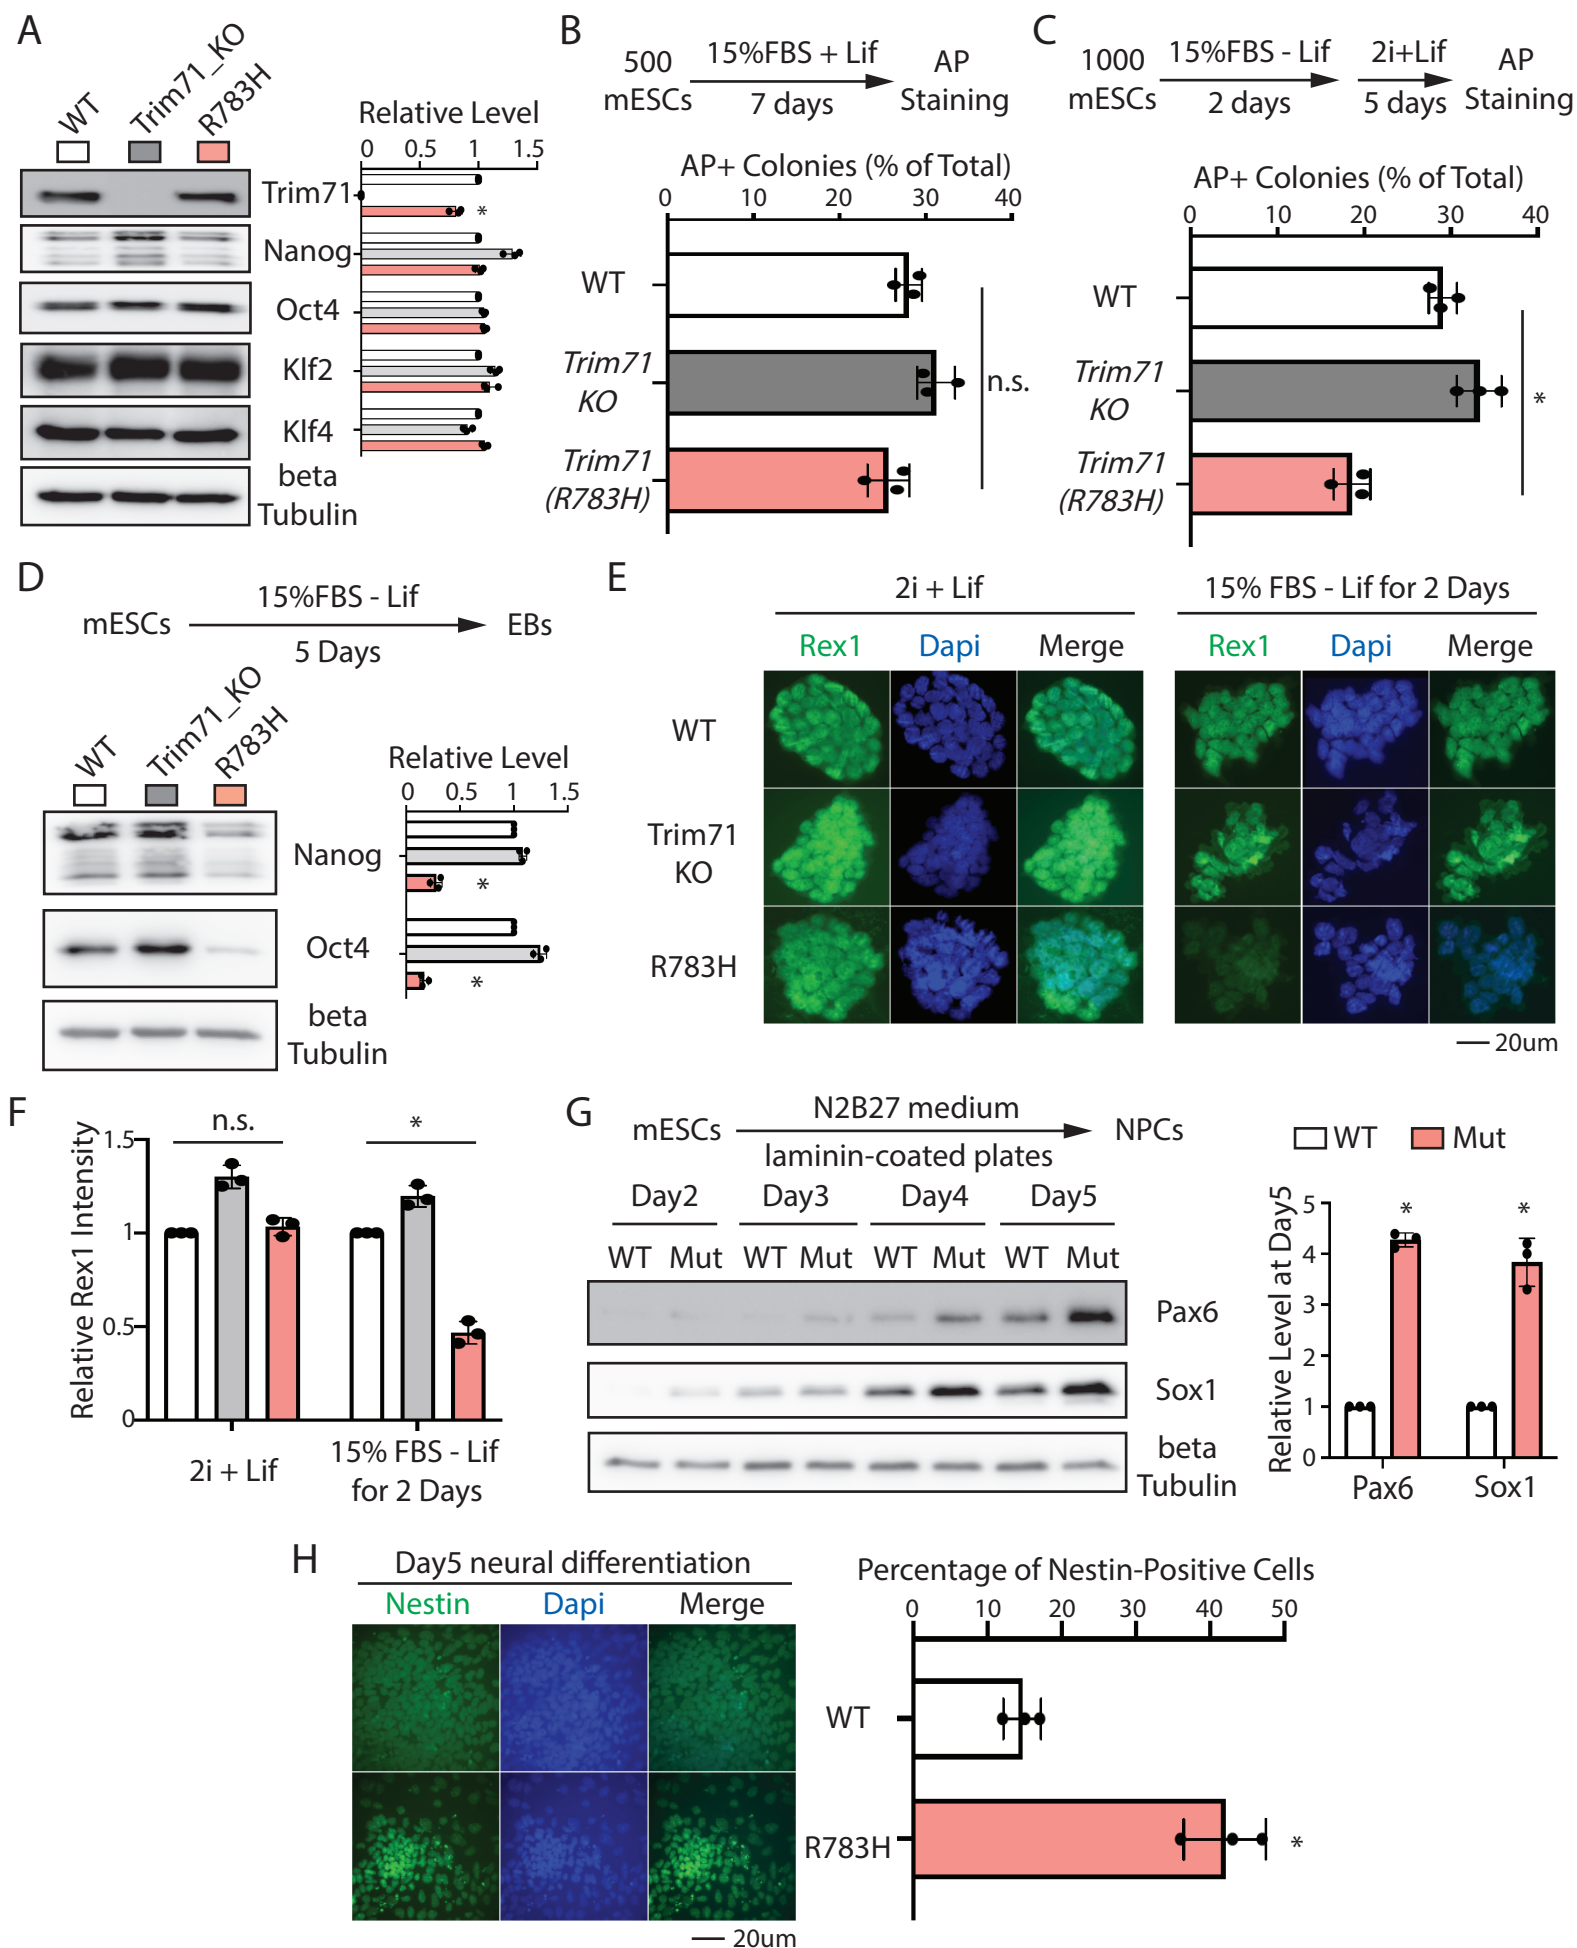



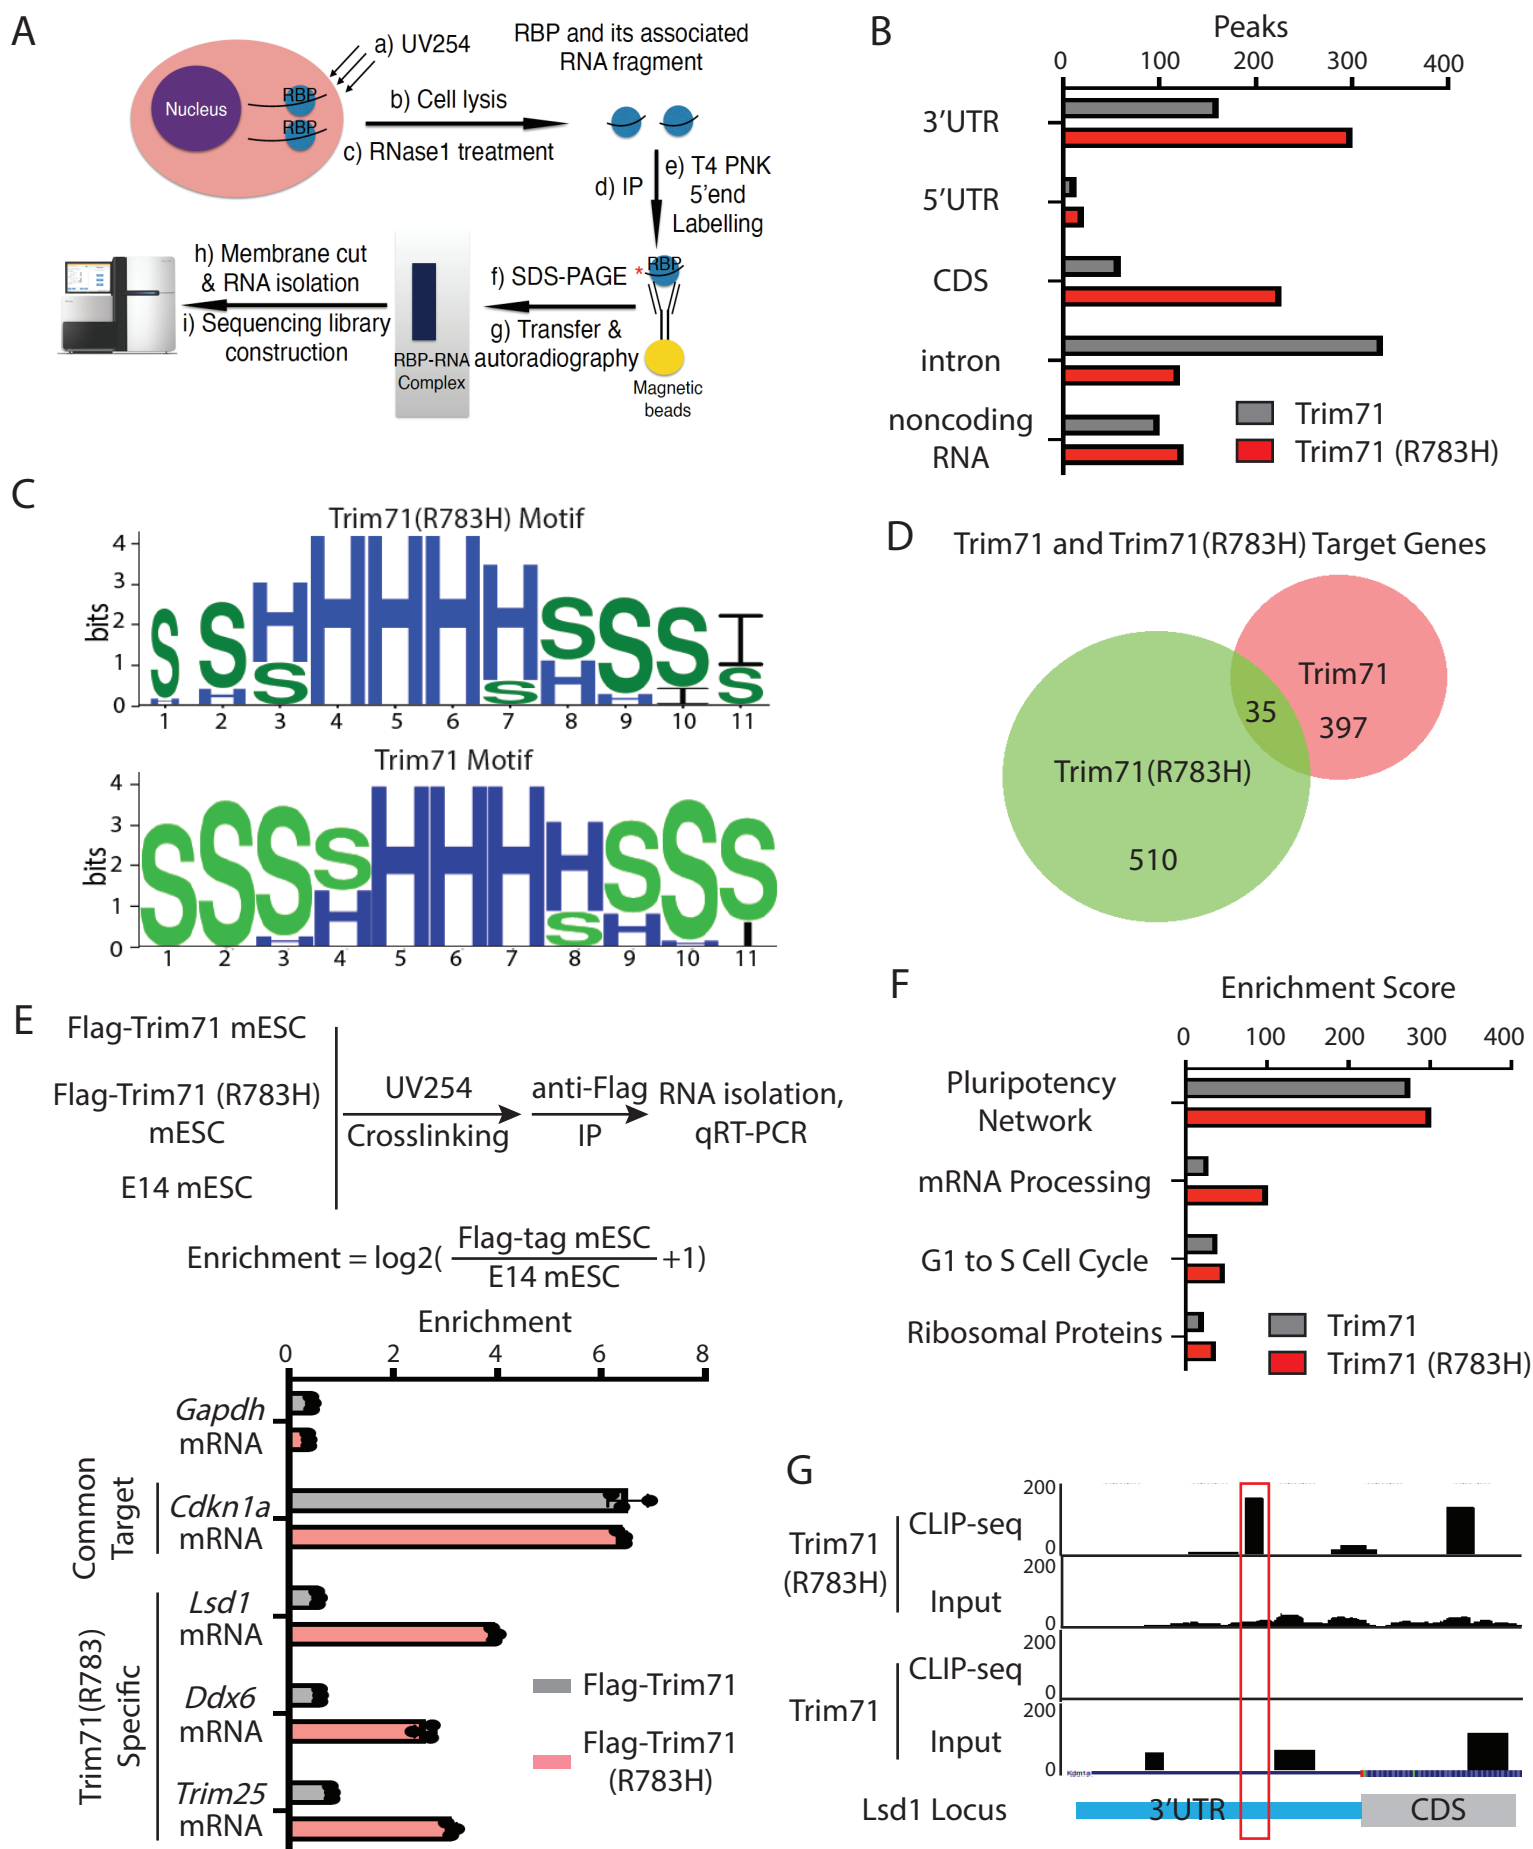

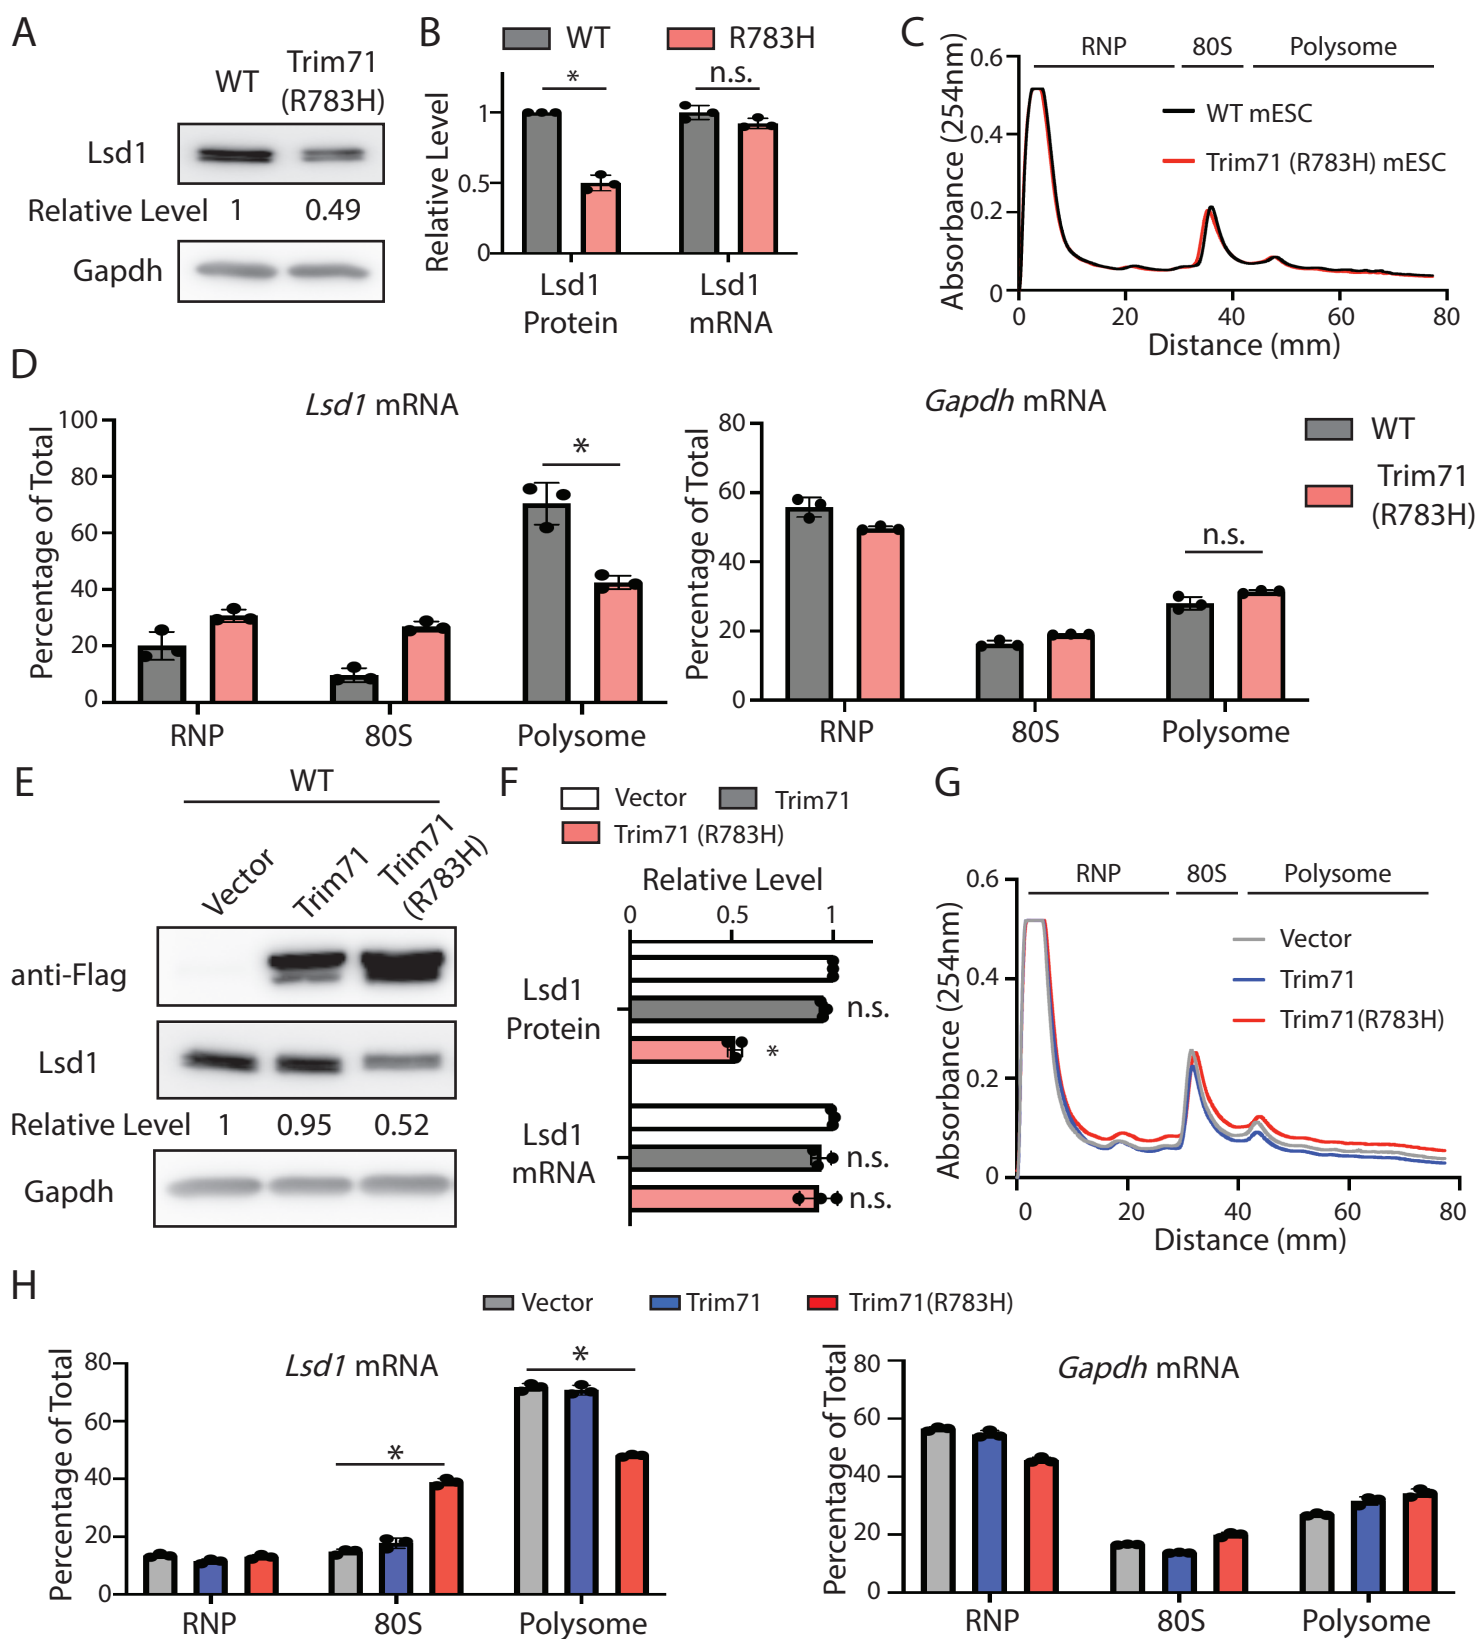

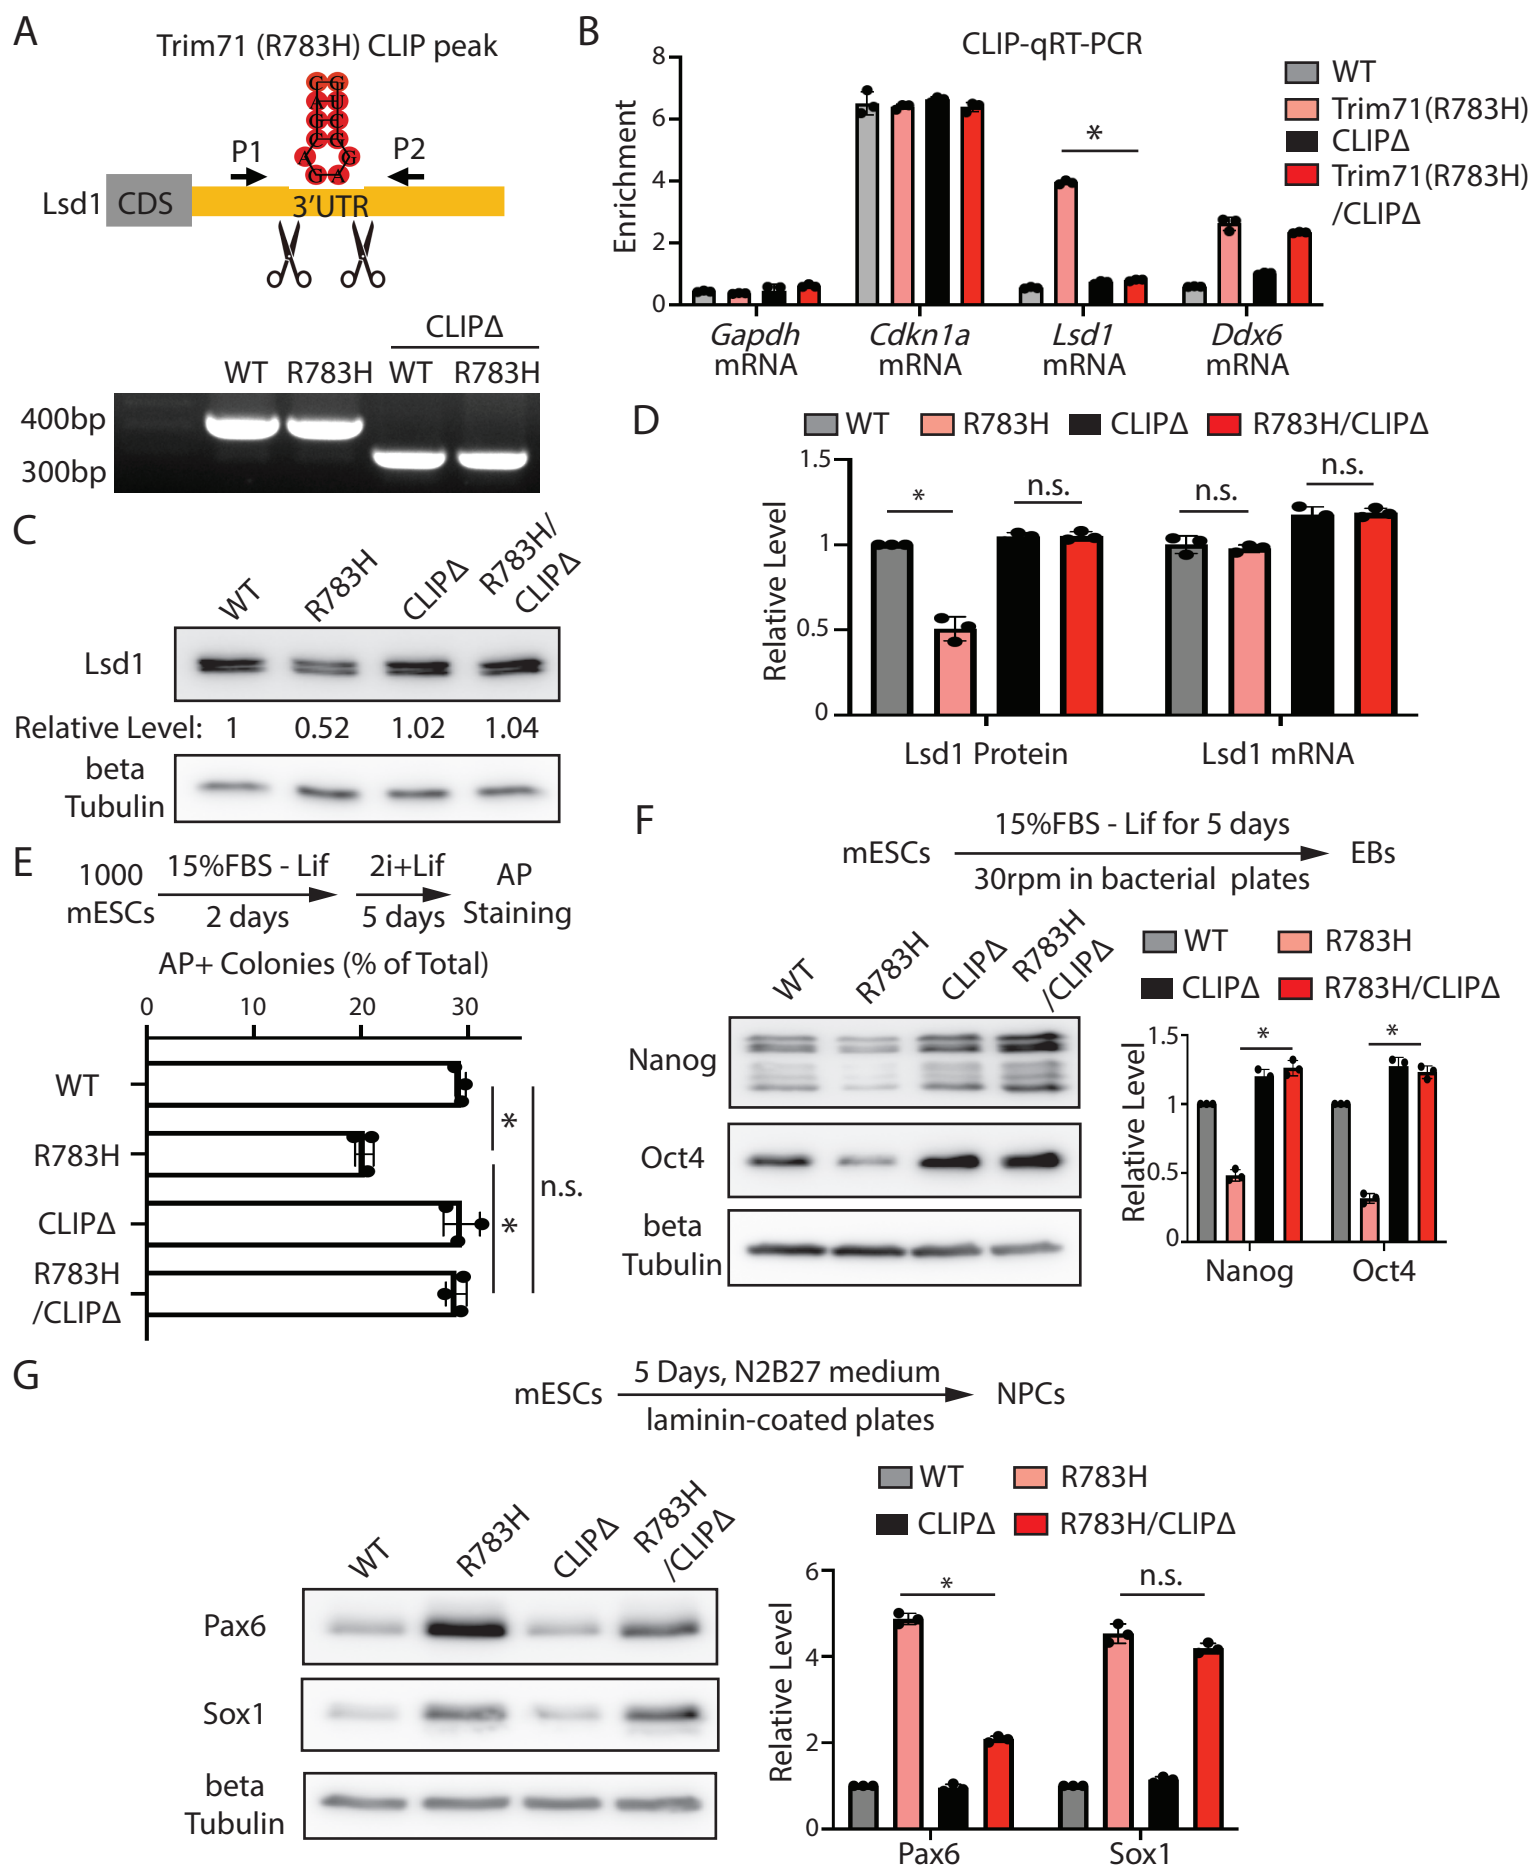

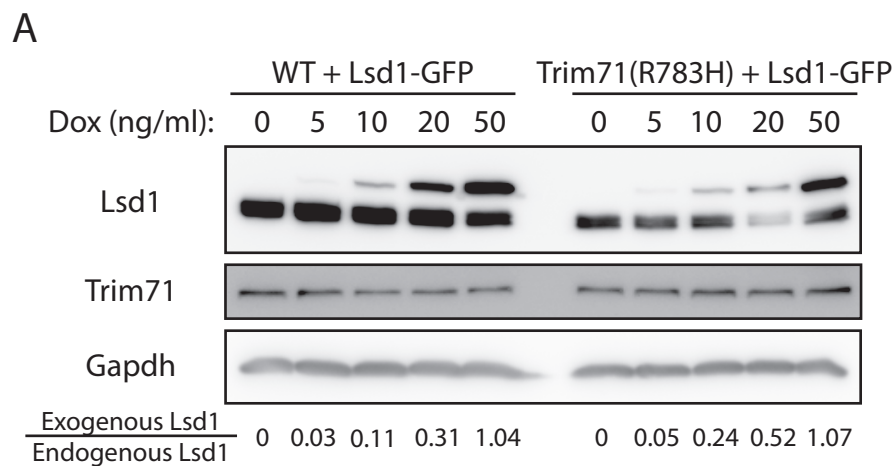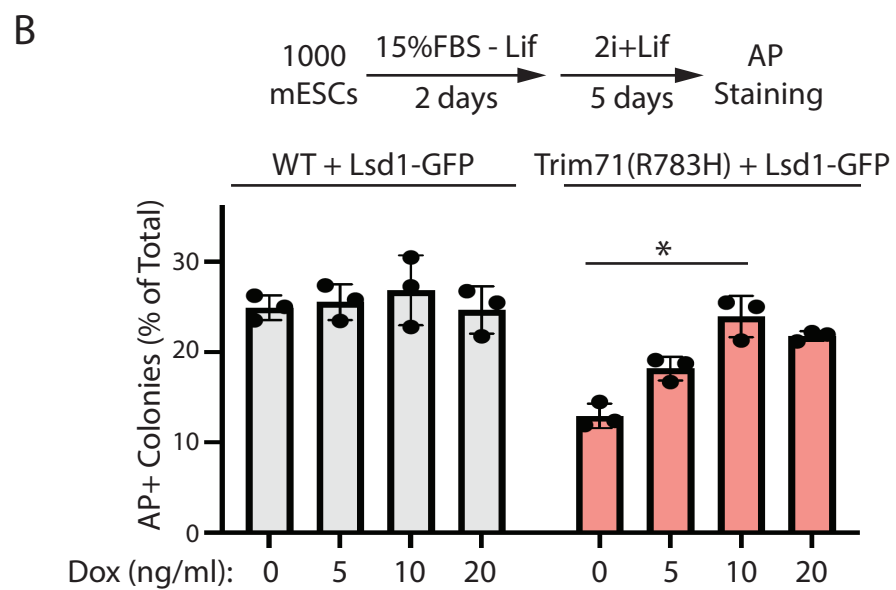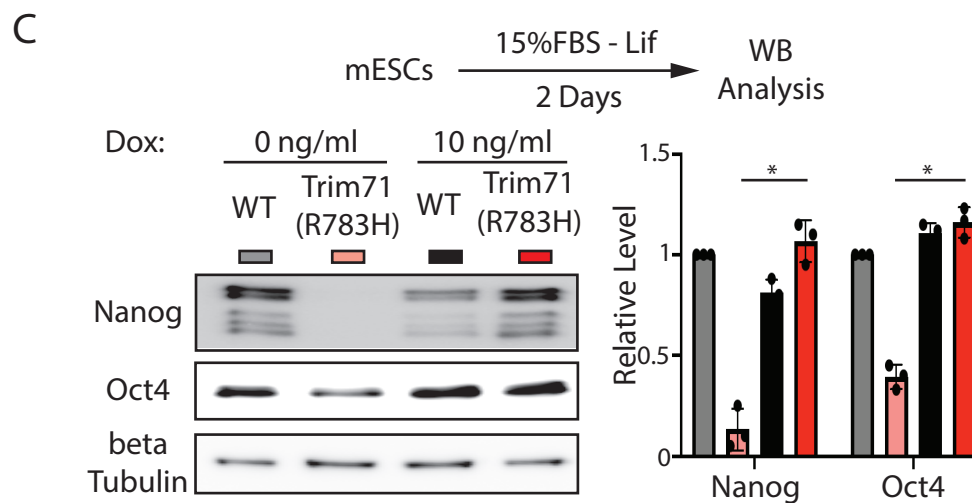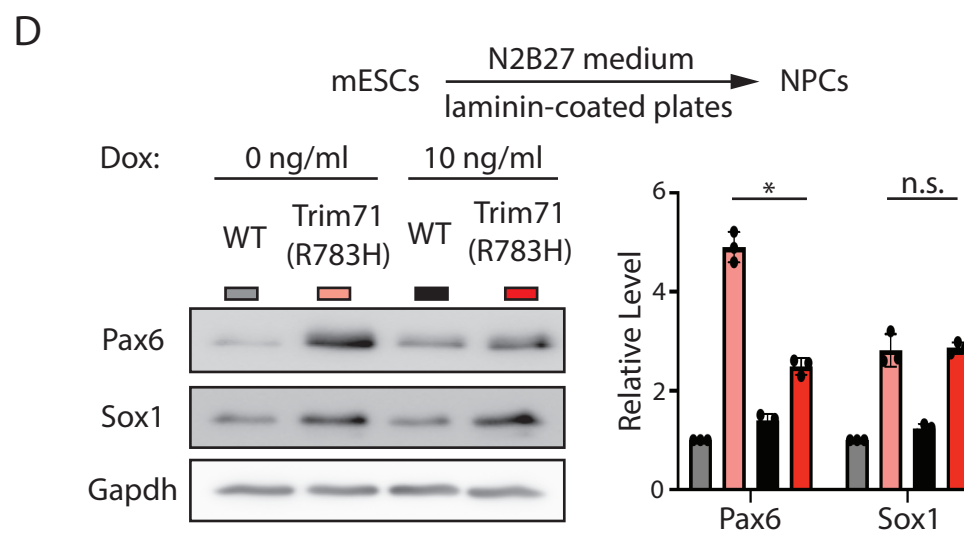

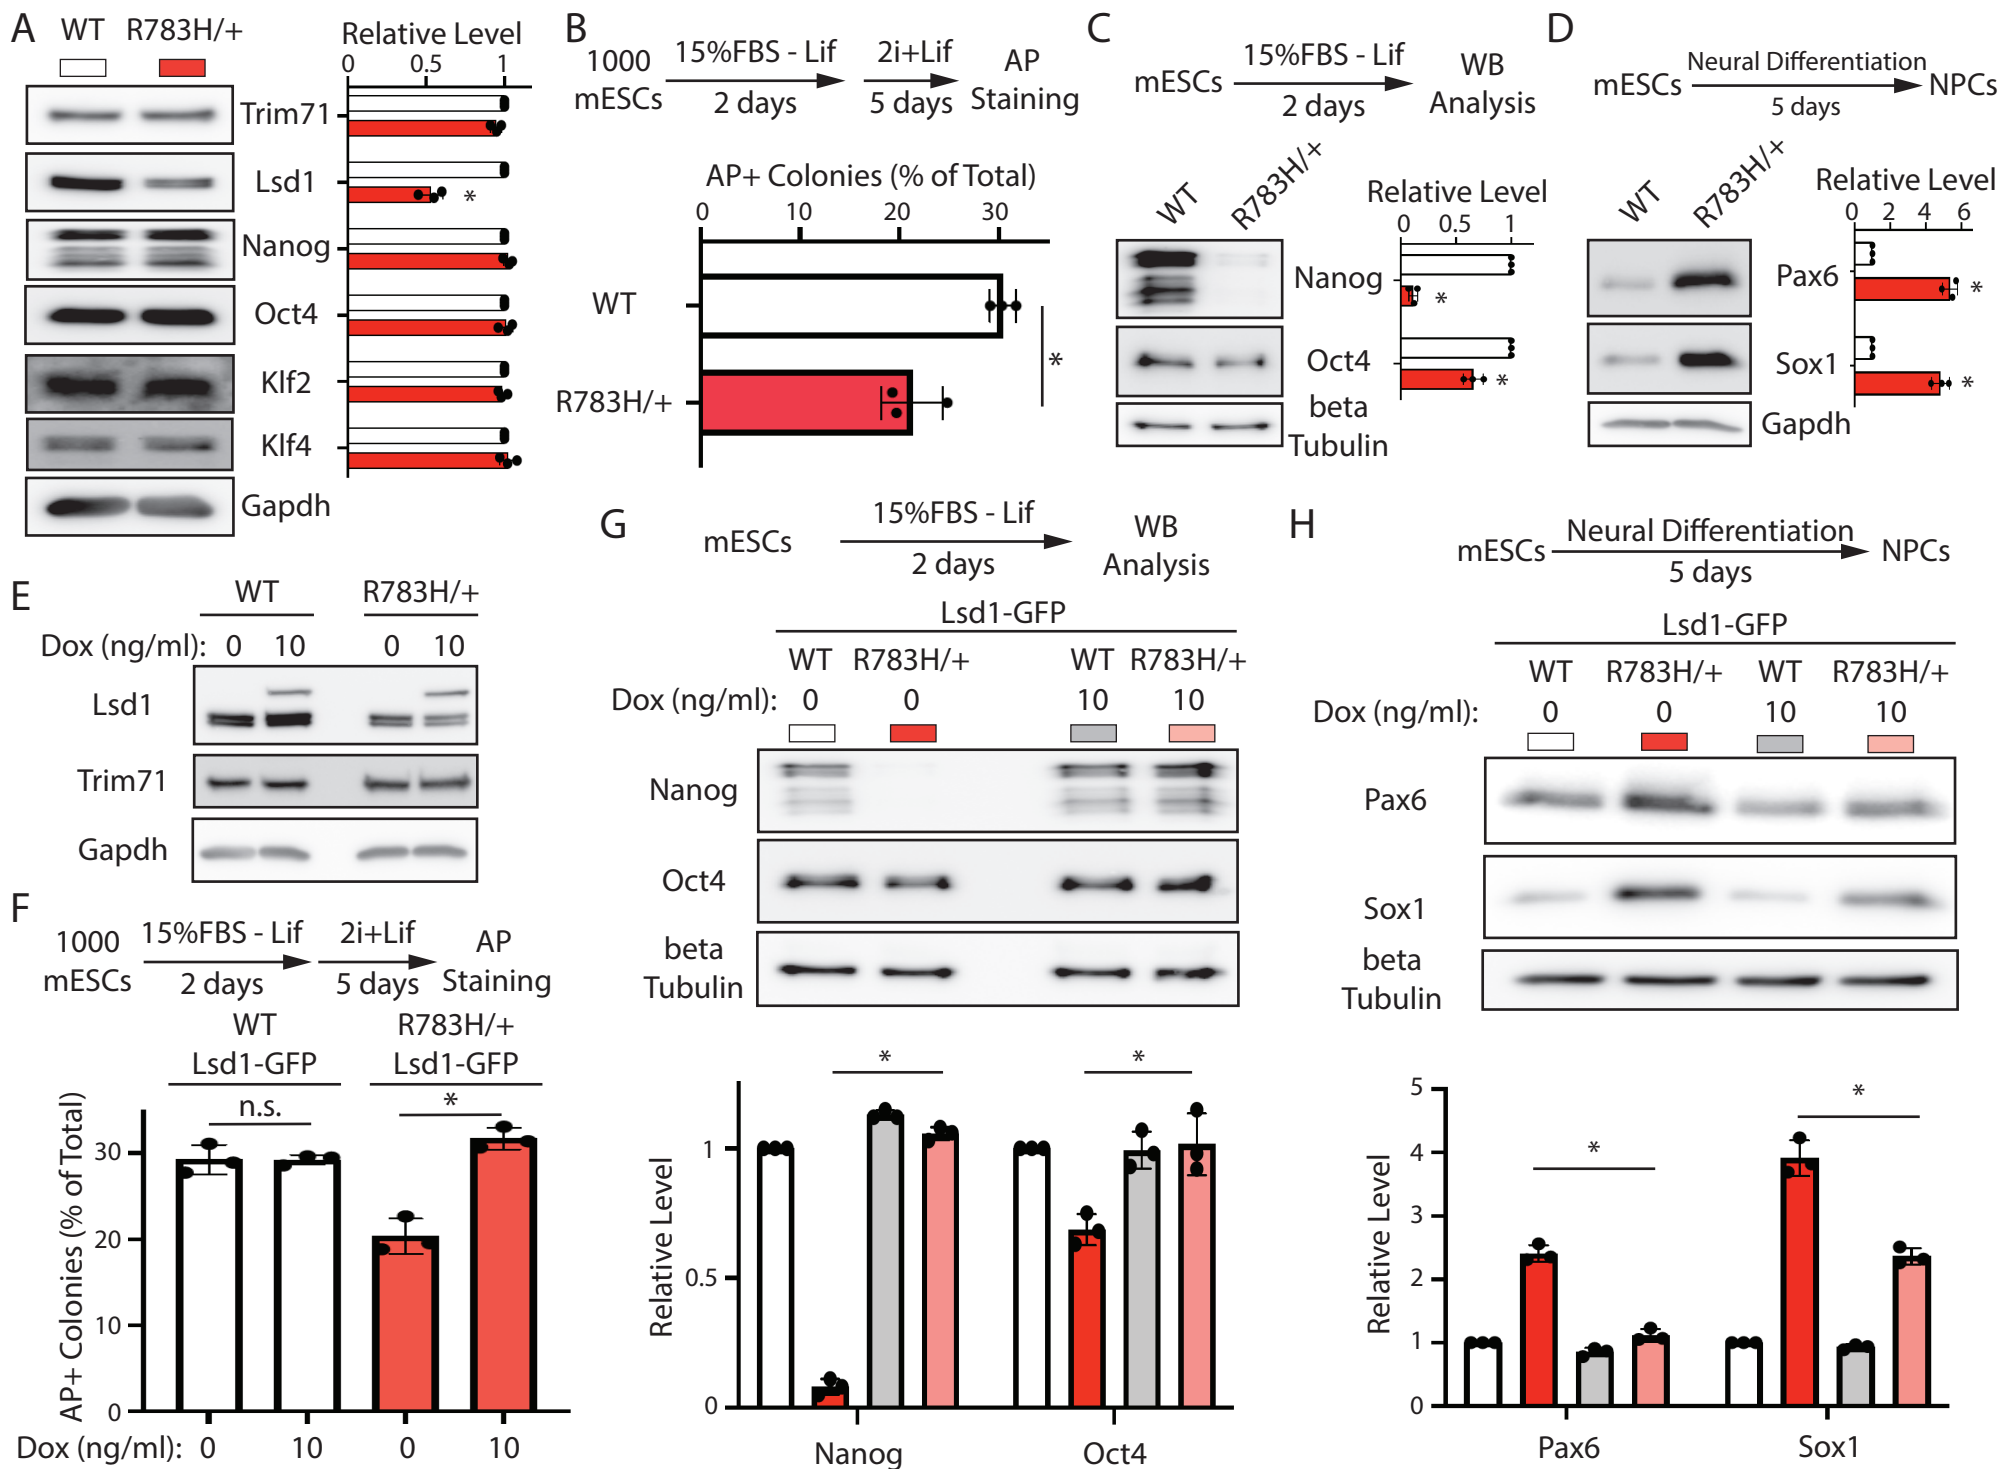

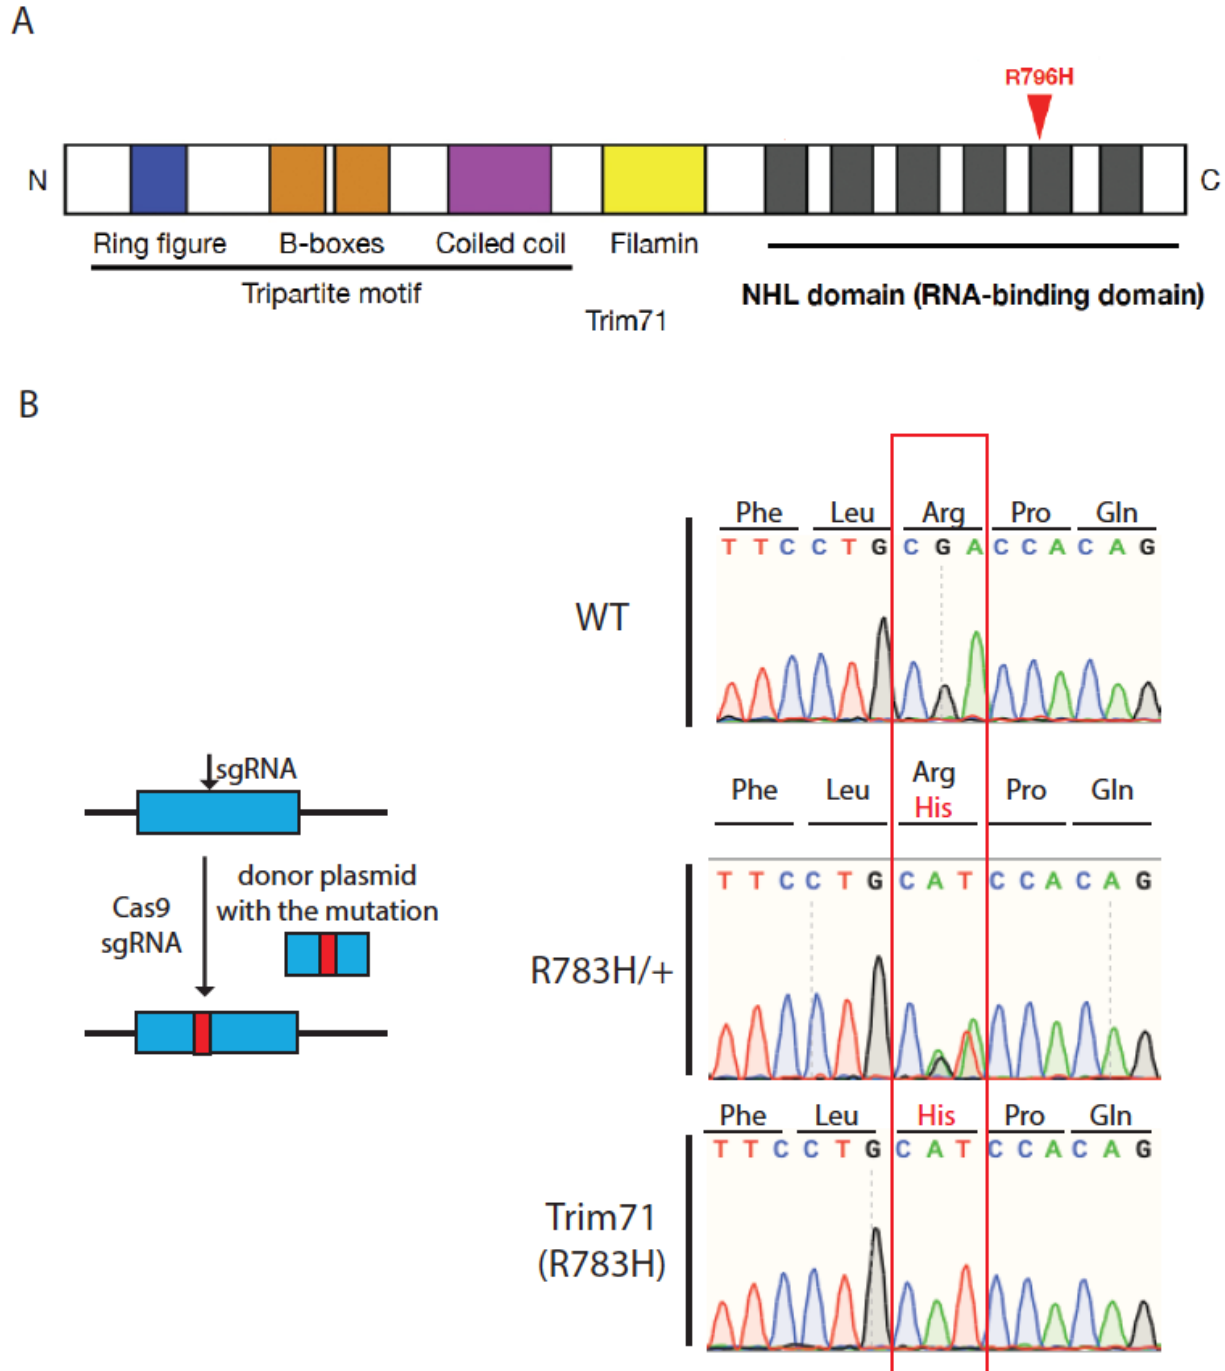

Figure 1-figure supplement 1. Generation of the Trim71 R783H monoallelic and bi-allelic mESCs.

- The location of R796H mutation on human Trim71 protein. The cartoon of Trim71 domain is adapted from Furey et al., 2018.
- Work flow of generating the R783H mutation in mESCs and sanger sequencing results verifying the mutation in mESCs.

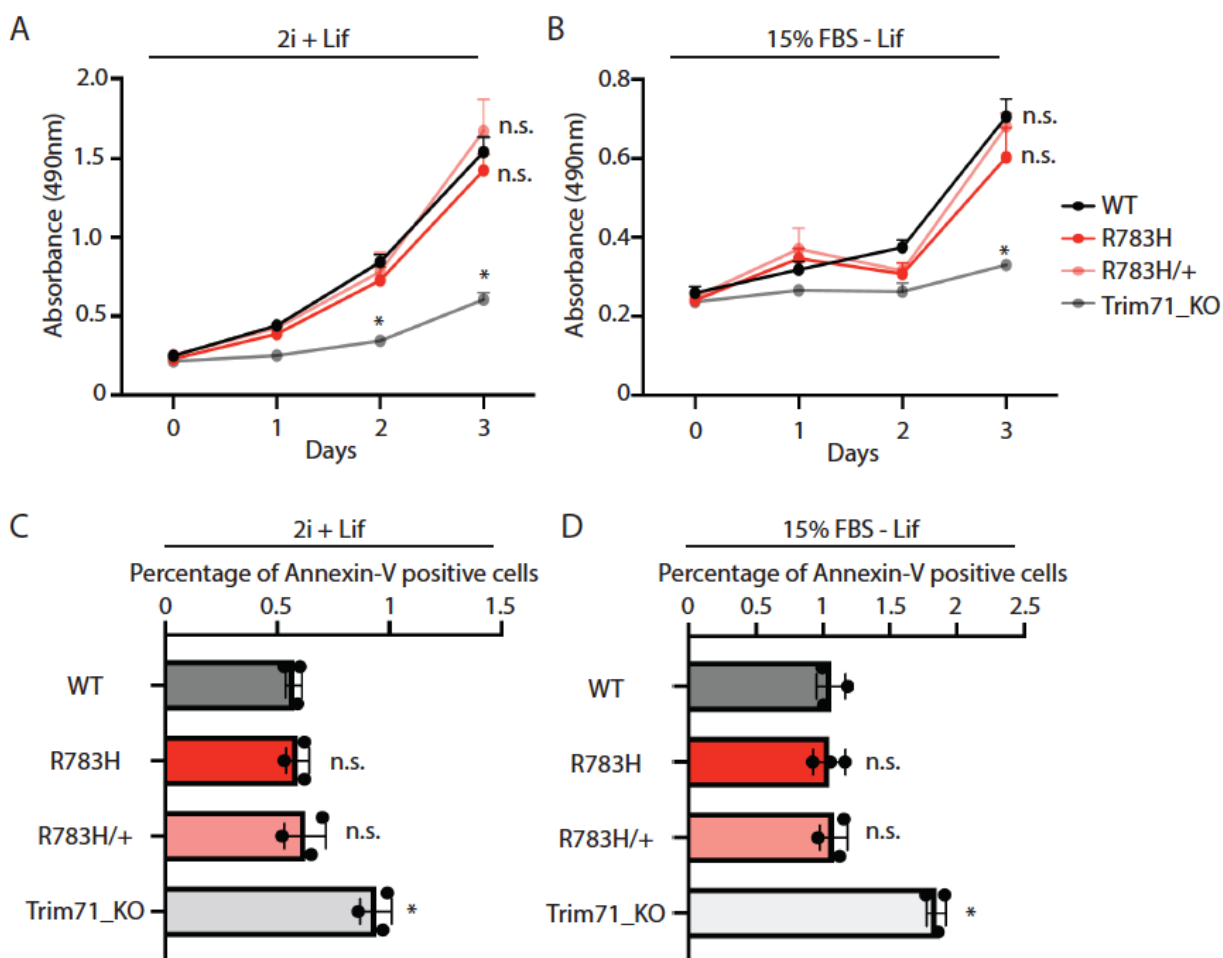

Figure 1-figure supplement 2. The R783H mutation in Trim71 does not change the proliferation and apoptosis of mESCs.

- Proliferation of mESCs under the stemness condition. The cells were cultured in the 2i+Lif medium, and the cell proliferation was monitored by the CellTiter 96 AQueous One Solution Cell Proliferation Assay (Promega).
- Proliferation of mESCs under the differentiating condition. The cells were cultured in the 15%FBS - Lif medium, and the cell proliferation was monitored by the CellTiter 96 AQueous One Solution Cell Proliferation Assay (Promega).
- Apoptosis of mESCs under the stemness condition. The cells were cultured in the 2i+Lif medium, and the cellular apoptotic state was monitored by annexin-V and PI staining followed by flow cytometry analysis.
- Apoptosis of mESCs under the differentiating condition. The cells were cultured in the 2i+Lif medium, and the cellular apoptotic state was monitored by annexin-V and PI staining followed by flow cytometry analysis.

The results represent the means ( $\pm$  SD) of three independent experiments. \*  $p < 0.05$ , n.s. not significant ( $p > 0.05$ ) by the Student's t-test.

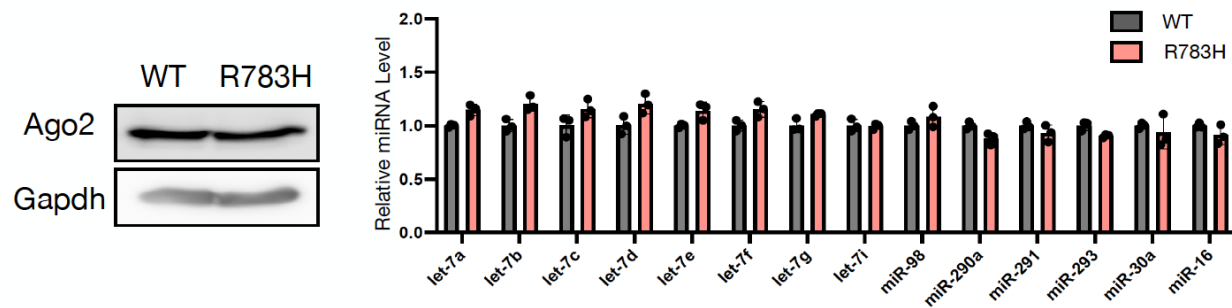

Figure 1-figure supplement 3. The R783H mutation in Trim71 does not alter the microRNA pathway in mESCs. The left panel shows a representative Western blot of Ago2 and Gapdh in the WT and R783H mESCs. The right panel shows the expression levels of a group of microRNAs in the WT and R783H mESCs. The microRNA levels were determined by qRT-PCR using U6 RNA levels for normalization. The qRT-PCR results represent the means ( $\pm$  SD) of three independent experiments, and none of the examined microRNAs have significantly different ( $p < 0.05$ ) expression levels in the R783H mutant mESCs as determined by the Student's t-test.



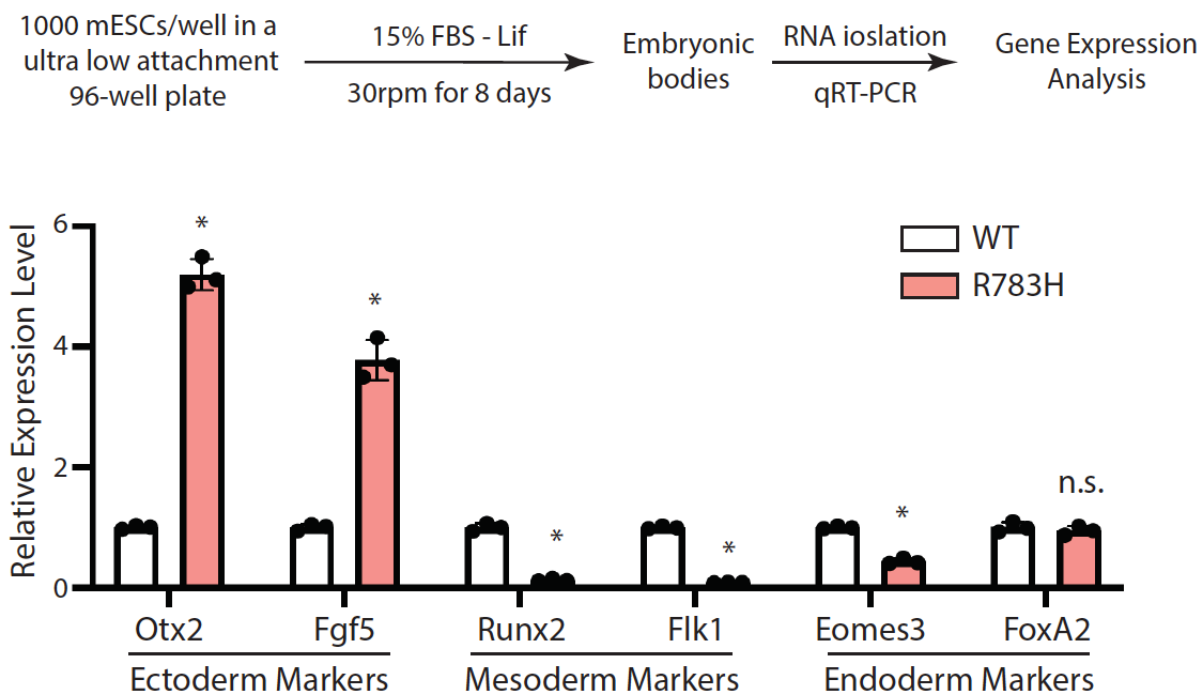

Figure 1-figure supplement 4. The R783H mESCs are more prone differentiate into the ectoderm lineage during EB formation. 18S rRNA was used for the normalization in the gene quantification by qRT-PCR. The qRT-PCR results represent the means ( $\pm$  SD) of three independent experiments. \*  $p < 0.05$ , n.s. not significant ( $p > 0.05$ ) by the Student's t-test.

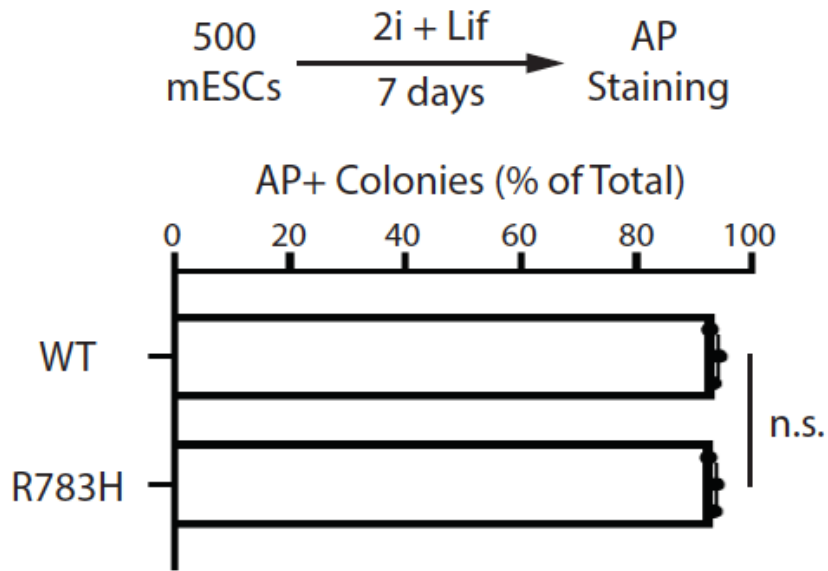

Figure 2-figure supplement 1. Colony formation assay for the WT and the R783H mESCs grown in the 2i+lif medium. The results represent the means ( $\pm$  SD) of three independent experiments. The colony morphology and AP intensity were evaluated through microscopy. 100-200 colonies were examined each time to determine the percentage of undifferentiated colonies. n.s. not significant ( $p > 0.05$ ) by the Student's t-test.

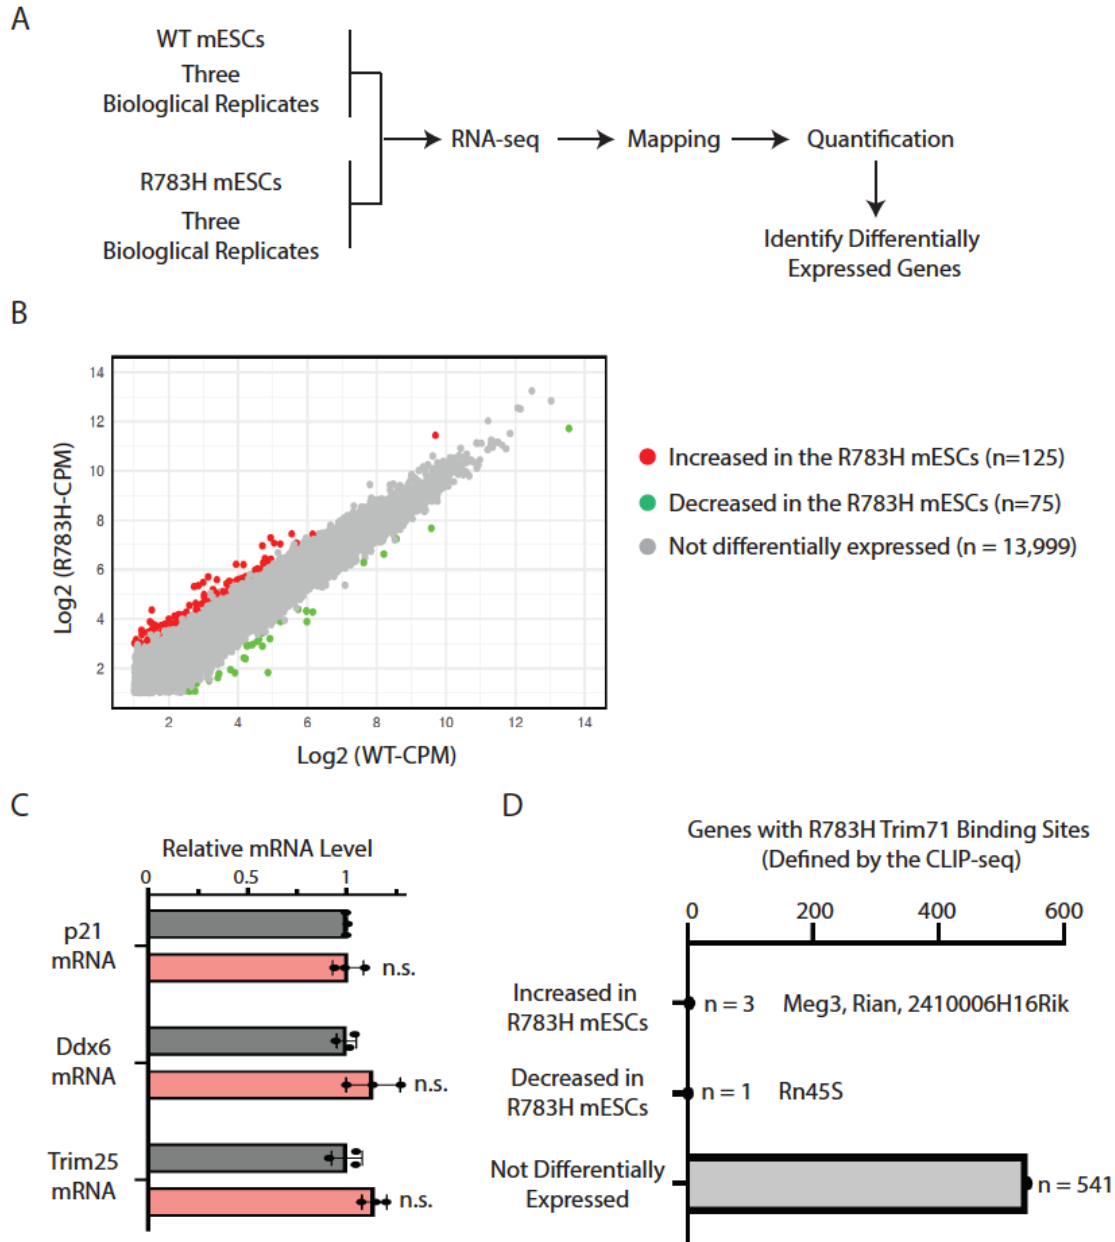

Figure 2-figure supplement 2. RNA-seq analysis of the WT and R783H mESCs.

A. Work flow of the RNA-seq analysis.

B. Differentially expressed genes in the WT and R783H mESCs. The differentially expressed genes were identified by the edgeR package. CPM: counts per million reads. The expression level of each gene is the average of the three biological replicates.

C. qRT-PCR verification on several target mRNAs of the R783H Trim71 mutant. 18S rRNA was used for normalization. The results represent the means ( $\pm$  SD) of three independent experiments. n.s. not significant ( $p > 0.05$ ) by the Student's t-test.

D. Distribution of the target RNAs of the R783H Trim71 mutant.

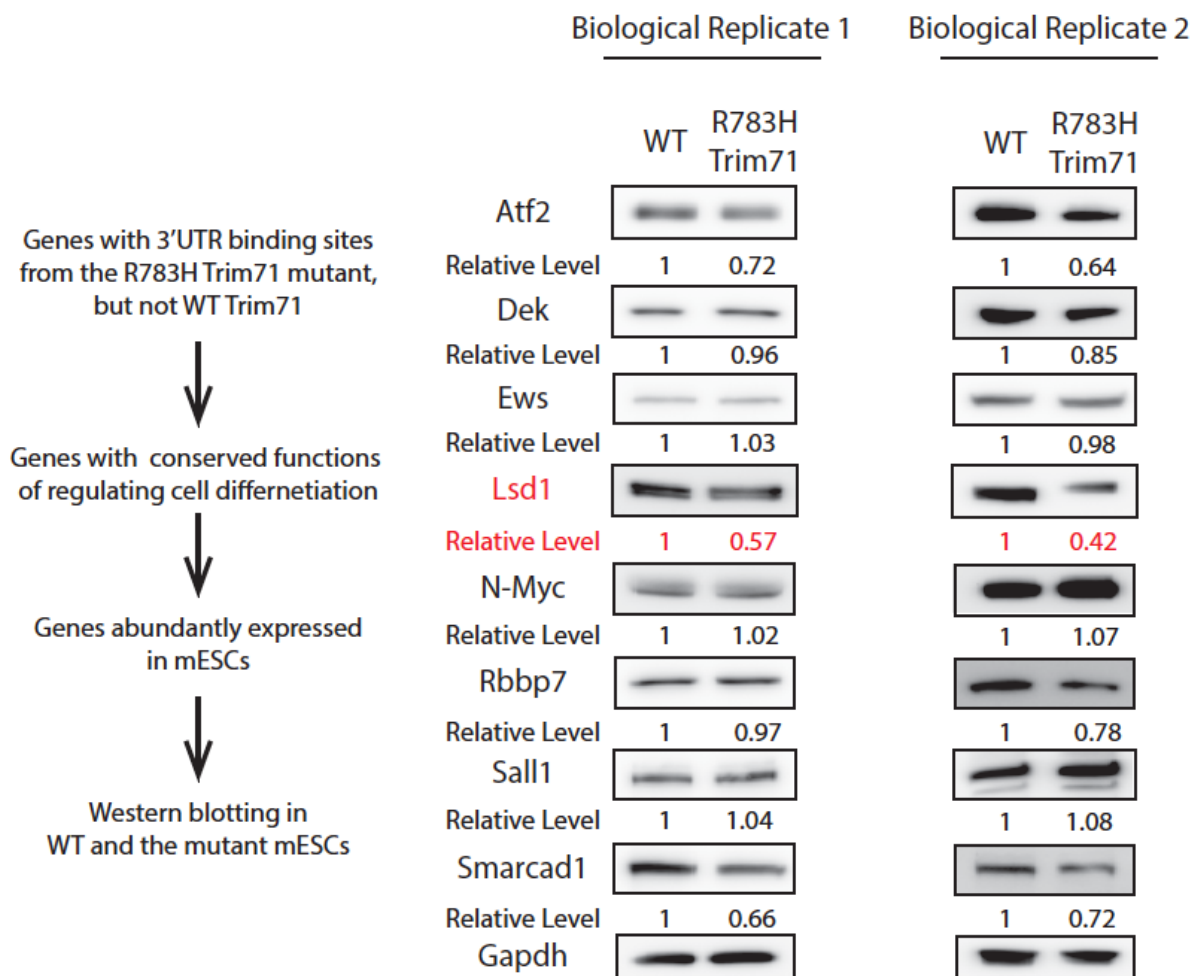

Figure 2-figure supplement 3. Identification of potential functional targets of the R783H Trim71 mutant. In each biological replicate of Western blotting, Gapdh was used for normalization in calculating the relative levels.

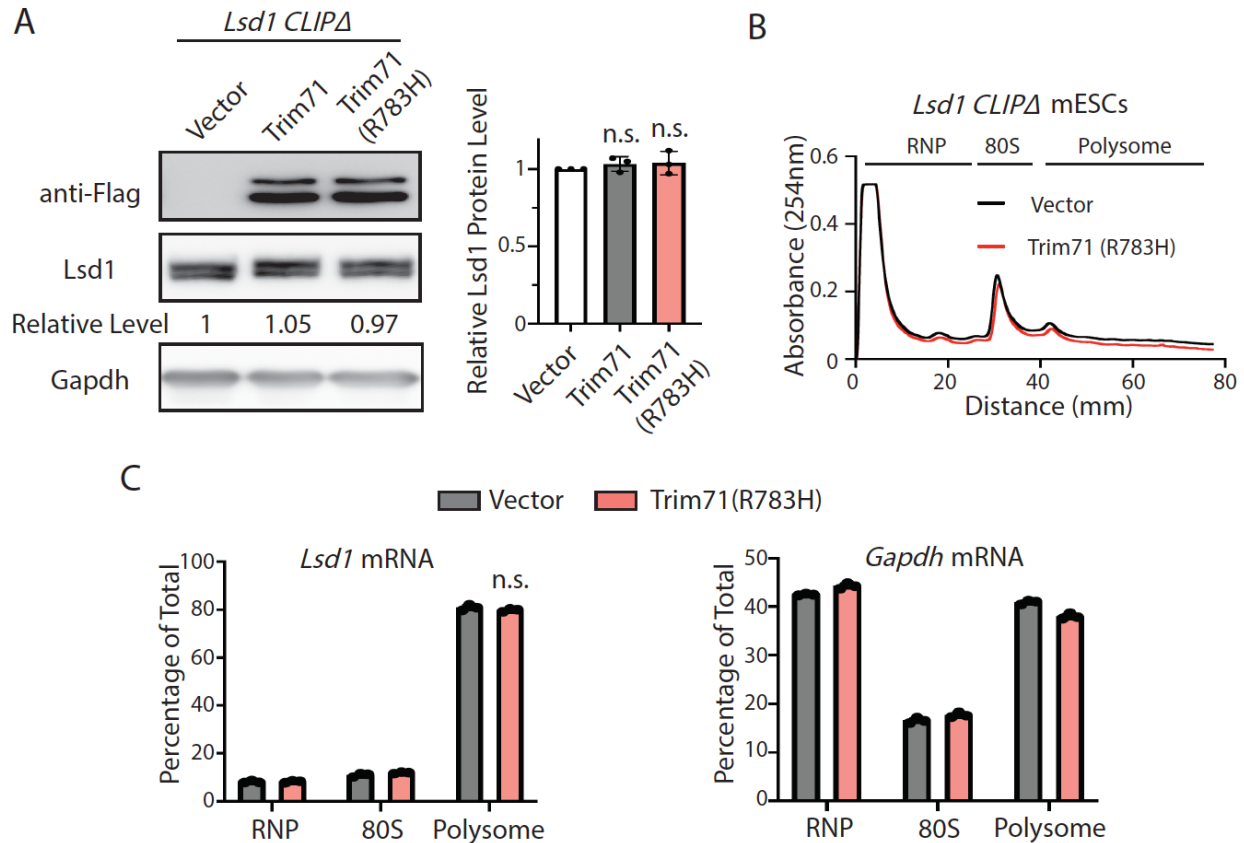

Figure 3-figure supplement 1. Repression of *Lsd1* mRNA translation by the Trim71 mutant R783H is dependent on its binding to *Lsd1* mRNA.

- A. A representative Western blot of the CLIPΔ mESCs expressing an empty vector, Flag-Trim71, and Flag-Trim71(R783H). Gapdh was used as a loading control for quantification of Lsd1 levels. The quantification results represent the means ( $\pm$  SD) of three independent experiments. n.s. not significant ( $p > 0.05$ ) by the Student's t-test.
- B. Polysome analysis in the CLIPΔ mESCs expressing an empty vector and Flag-Trim71(R783H).
- C. Quantification of the indicated mRNA distribution in the RNP, 80S, and polysome fractions from the CLIPΔ mESCs expressing an empty vector and Flag-Trim71(R783H). The results represent the means ( $\pm$  SD) of three independent experiments. n.s. not significant ( $p > 0.05$ ) by the Student's t-test.

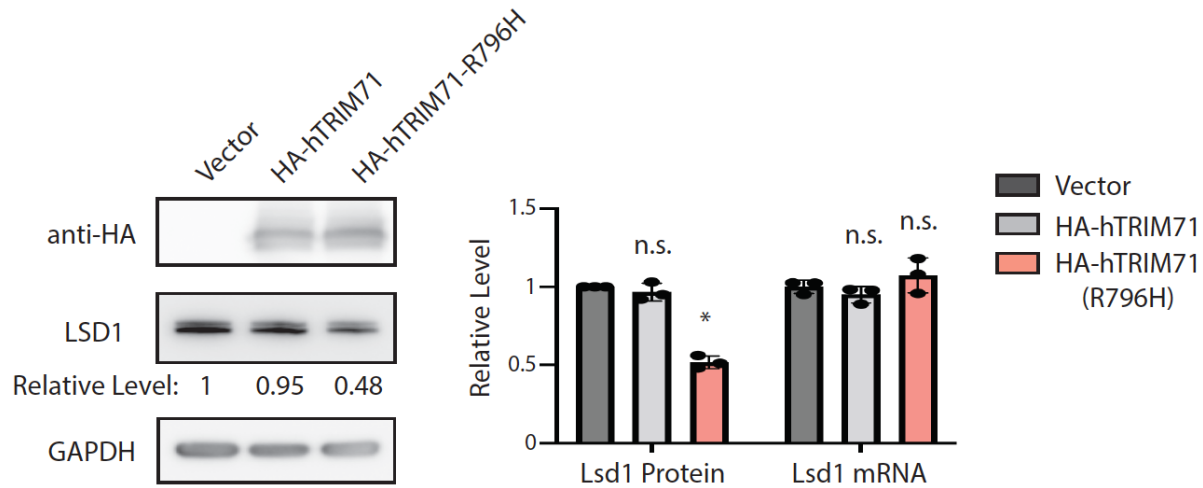

Figure 3-figure supplement 2. The human TRIM71 mutant R796H represses LSD1. A representative Western blotting the NCCIT cells expressing an empty vector, HA-hTRIM71, and HA-hTrim71(R796H). Gapdh was used for normalization in the quantification of Lsd1 protein levels, and 18S rRNA was used for normalization in the qRT-PCR quantification of Lsd1 mRNA levels. The quantification results represent the means ( $\pm$  SD) of three independent experiments. \*  $p < 0.05$ , n.s. not significant ( $p > 0.05$ ) by the Student's t-test.

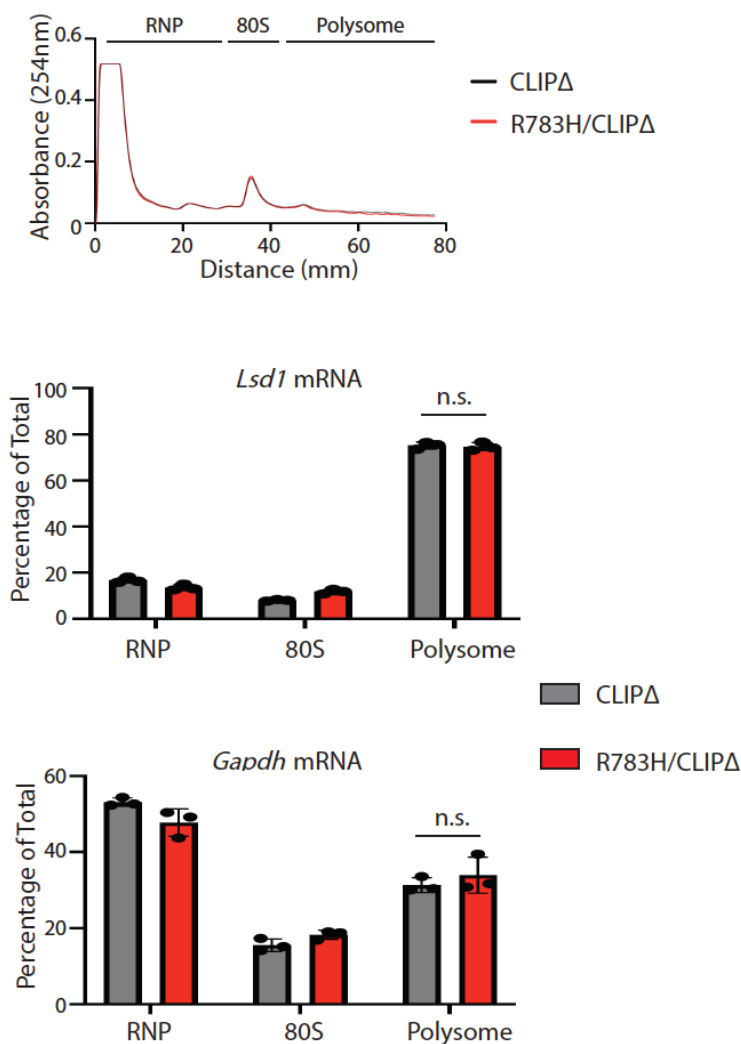

Figure 4-figure supplement 1. The R783H mutation in the *Lsd1* CLIPΔ background does not alter the polysome association of *Lsd1* mRNA. Polysome analysis was performed in the *Lsd1* CLIPΔ mESCs and the *Lsd1* CLIPΔ/R783H mESCs. qRT-PCR was used to quantify the indicated mRNAs in the RNP, 80S, and polysome regions on the sucrose density gradient. The results represent the means ( $\pm$  SD) of three independent experiments. n.s. not significant ( $p > 0.05$ ) by the Student's t-test.

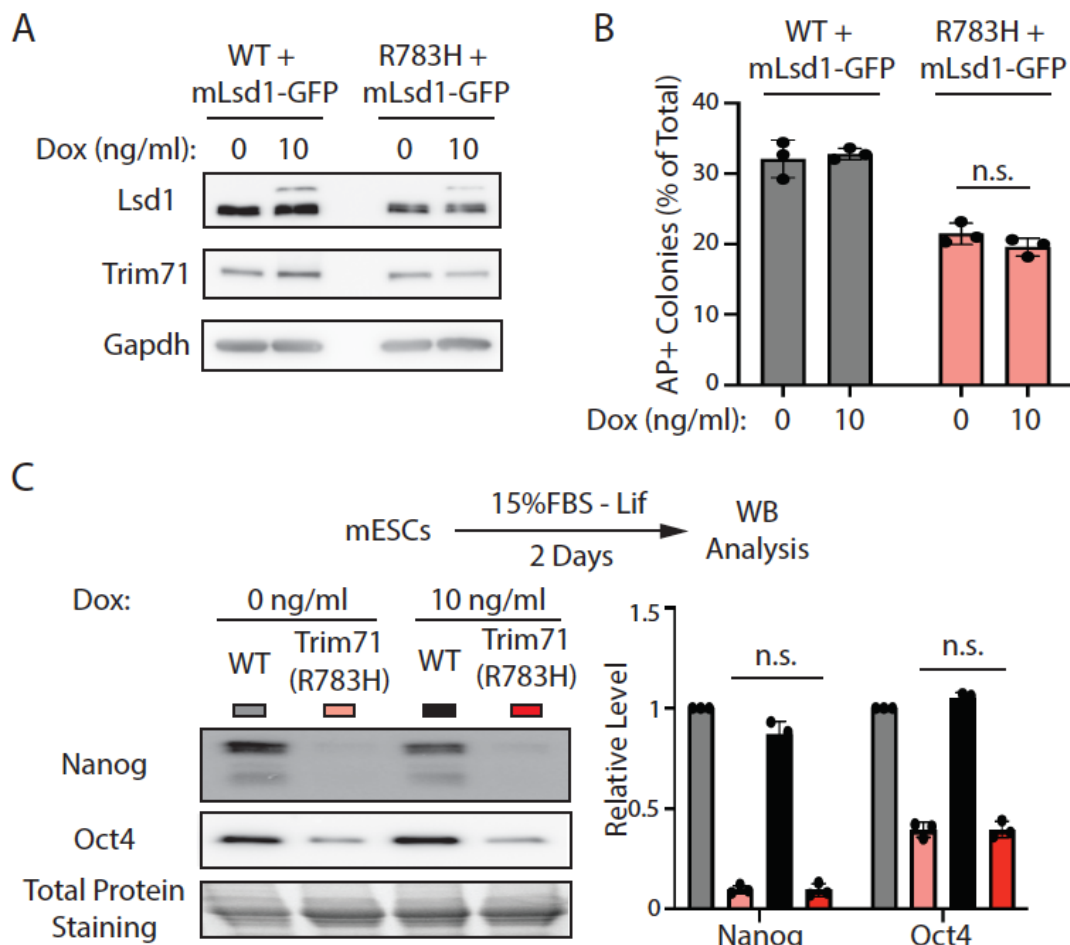

Figure 5-figure supplement 1. The demethylase catalytic mutant Lsd1 fails to alleviate the stem cell differentiation defects in the Trim71(R783H) mESCs.

- A. Western blotting in the WT and the Trim71(R783H) mESCs with dox-inducible expression of a demethylase catalytic mutant (K661A) Lsd1 (mLsd1-GFP).  
 B. Exit pluripotency assay for mESCs.  
 C. Representative Western blotting and quantification of pluripotency factors during the monolayer differentiation of mESCs.

In B, the colony morphology and AP intensity were evaluated through microscopy. 100-200 colonies were examined each time to determine the percentage of undifferentiated colonies. The quantification results from B and C represent the means ( $\pm$  SD) of three independent experiments. Total protein levels were used for normalization in the quantification results of C. \* $p < 0.05$ ; and n.s. not significant ( $p > 0.05$ ) by the Student's t-test.
